# Supplementary material for: Synthesis and bioactive evaluation of N-((1-methyl-1H-indol-3-yl)methyl)-N-(3,4,5-trimethoxyphenyl)acetamide derivatives as agents for inhibiting tubulin polymerization
Source: Royal Society of Chemistry journal article supplement (doi:10.1039/d2md00340f), 2022-10-28

## Supporting Information

Synthesis and bioactive evaluation of N-((1-methyl-1H-indol-3-yl)methyl)-N-(3,4,5-trimethoxyphenyl)acetamide derivatives as agents for inhibiting tubulin polymerization

MS,  $^1\text{H}$  NMR and  $^{13}\text{C}$  NMR spectrum of Compounds 7a-7r

7a :

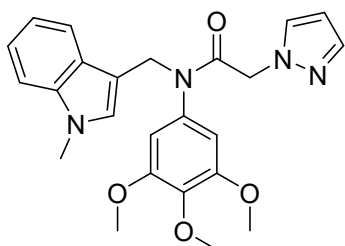

1 #14 RT: 0.15 AV: 1 NL: 9.23E6  
T: FTMS - c APCI corona Full ms [50.0000-750.0000]

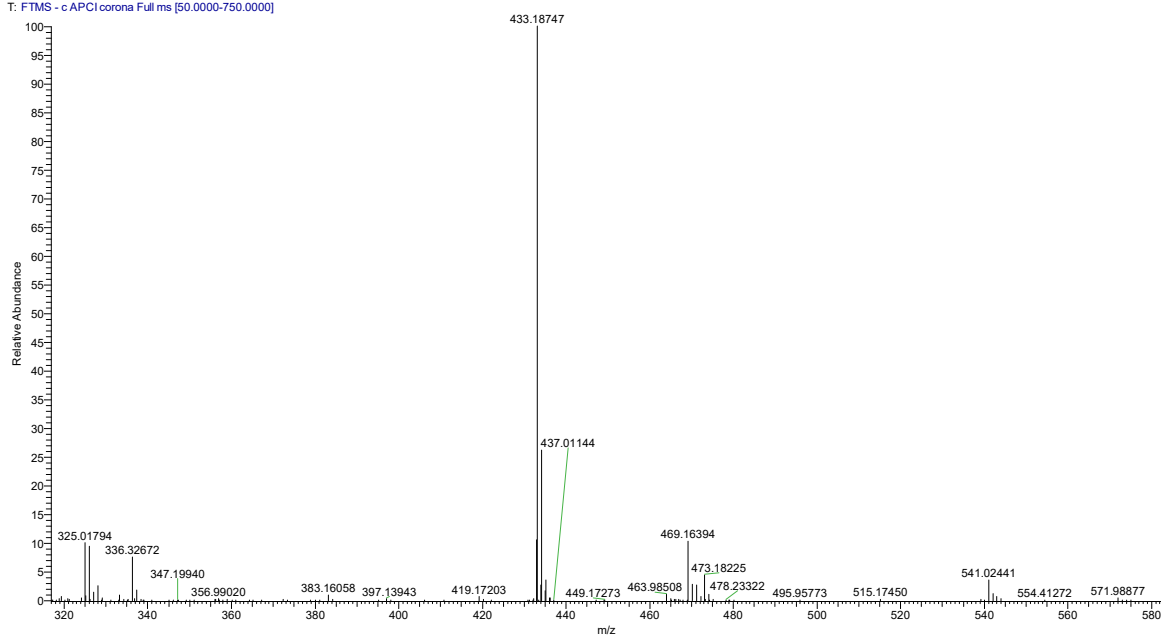

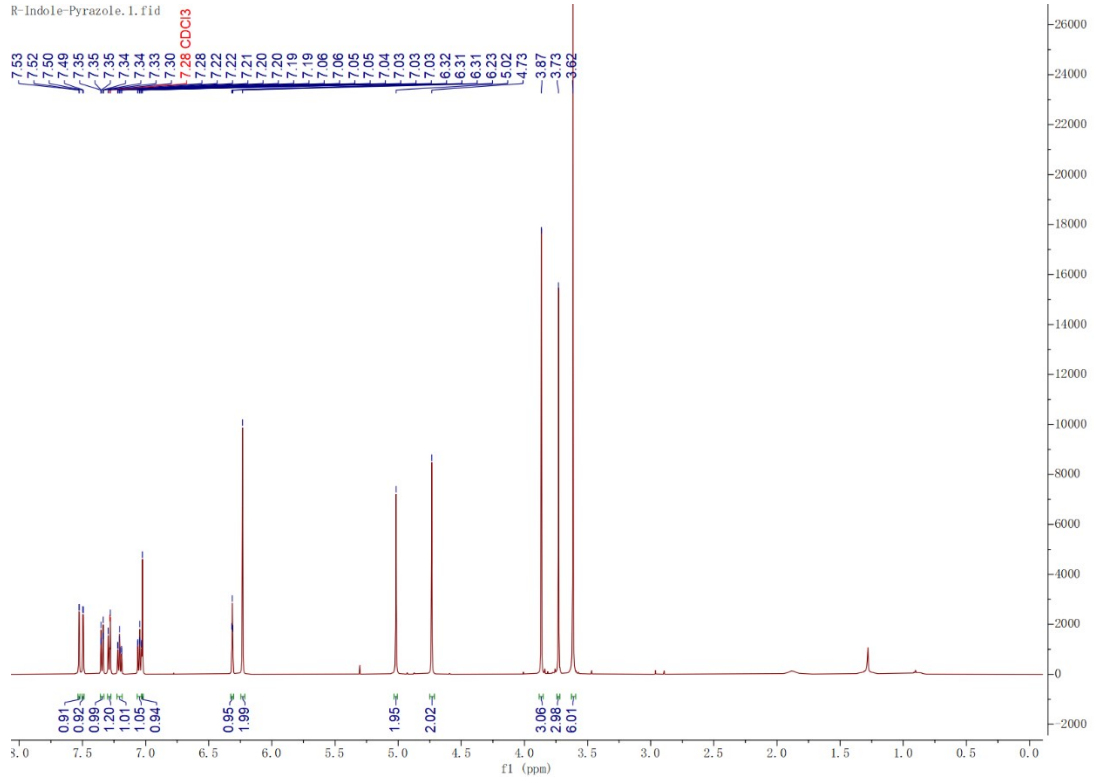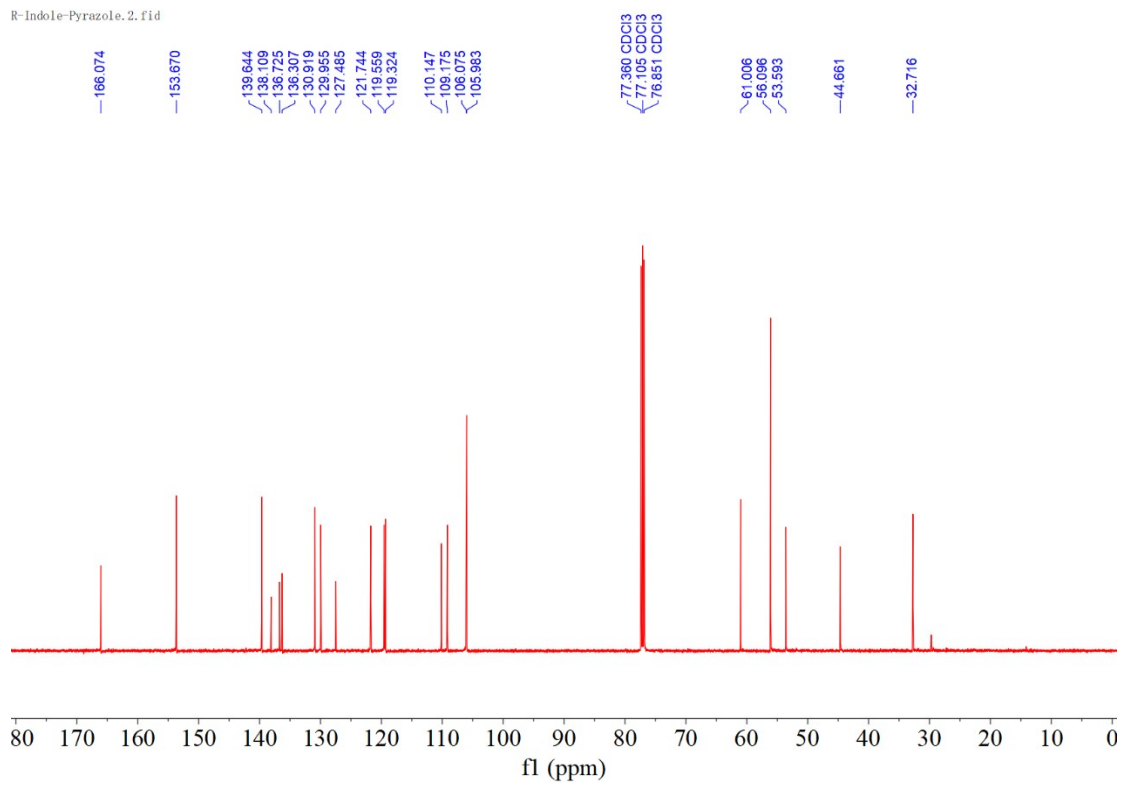

7b :

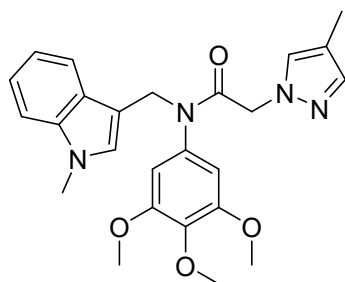

7 #21 RT: 0.21 AV: 1 NL: 6.54E7  
T: FTMS + c APCI corona Full ms [60.0000-900.0000]

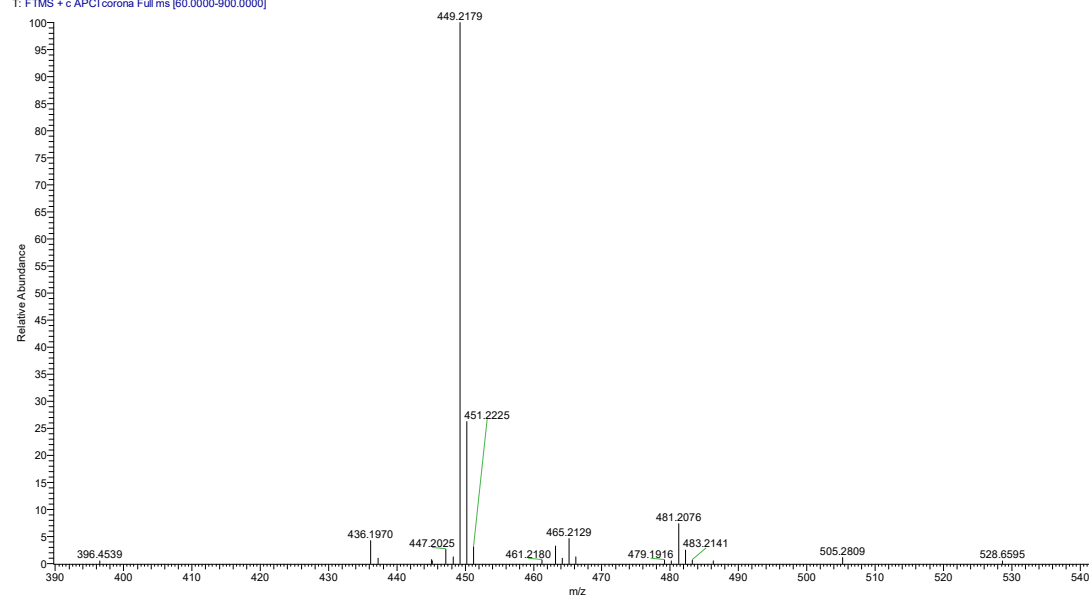

RN-Indole-Pyrazolo[4-CH3]. 1. fid

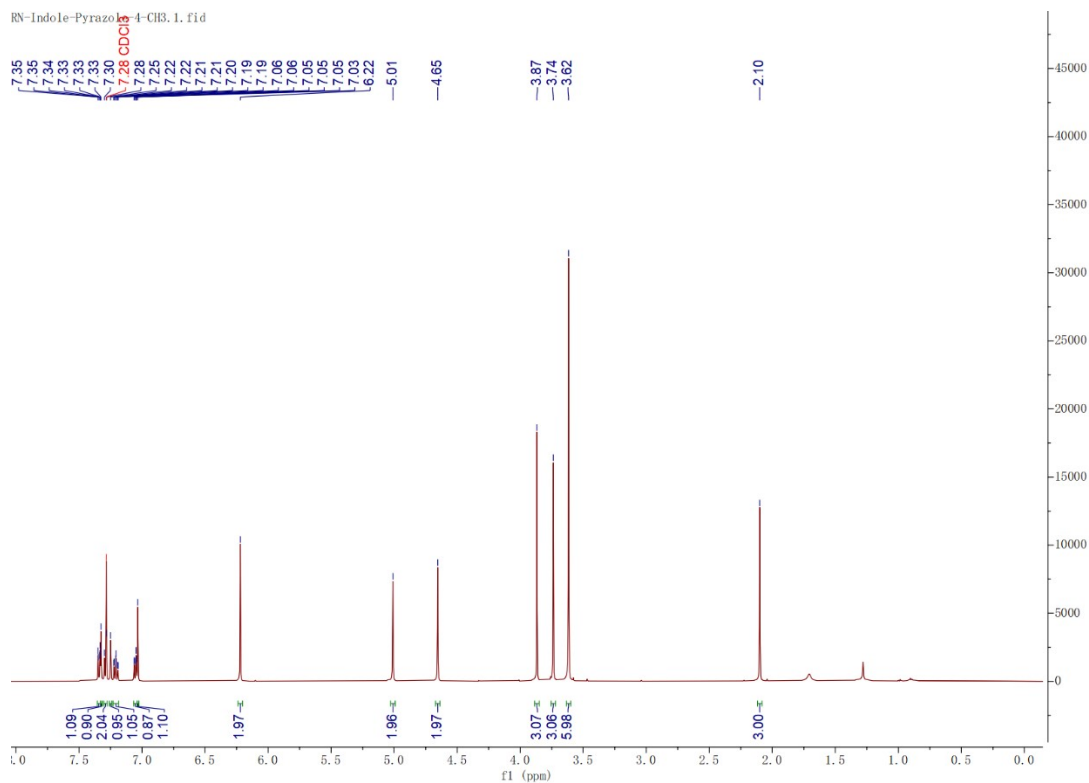

RN-Indole-Pyrazole-4-CH3. 2. fid

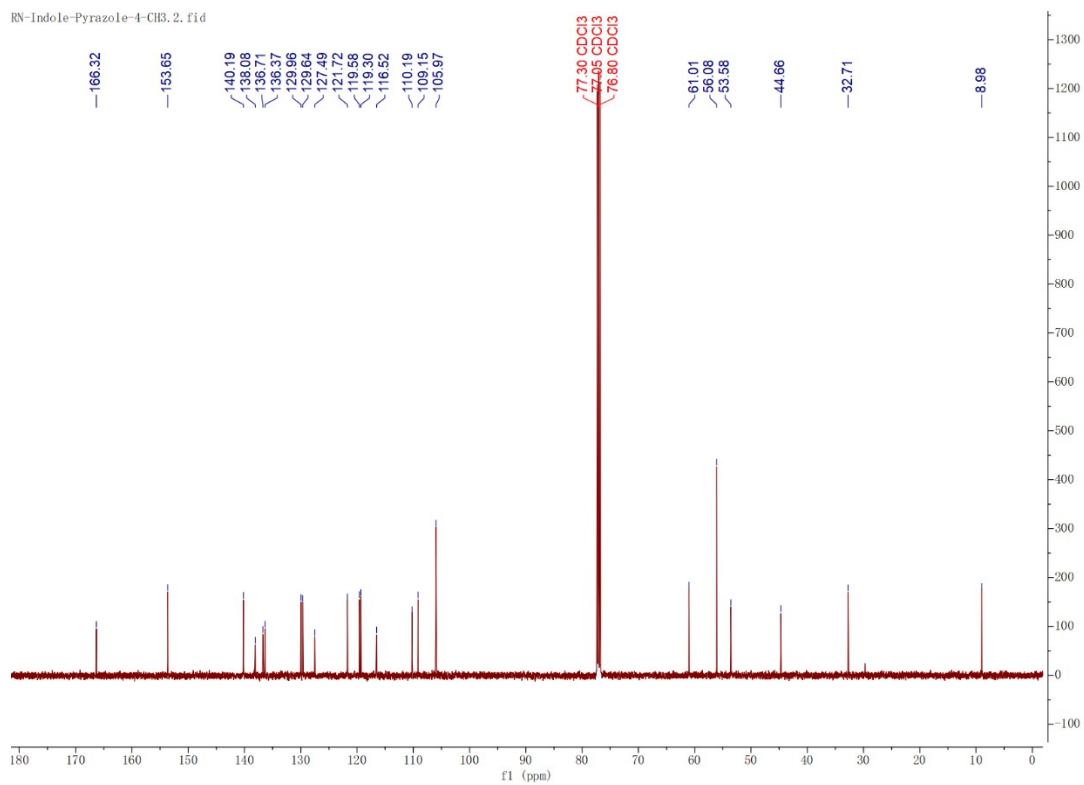

7c :

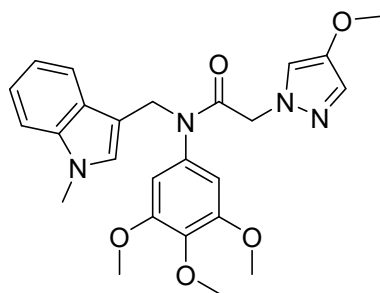

# 21 RT: 0.21 AV: 1 NL: 4.22E7  
T: FTMS + c-APCI corona Full ms [80.0000-900.0000]

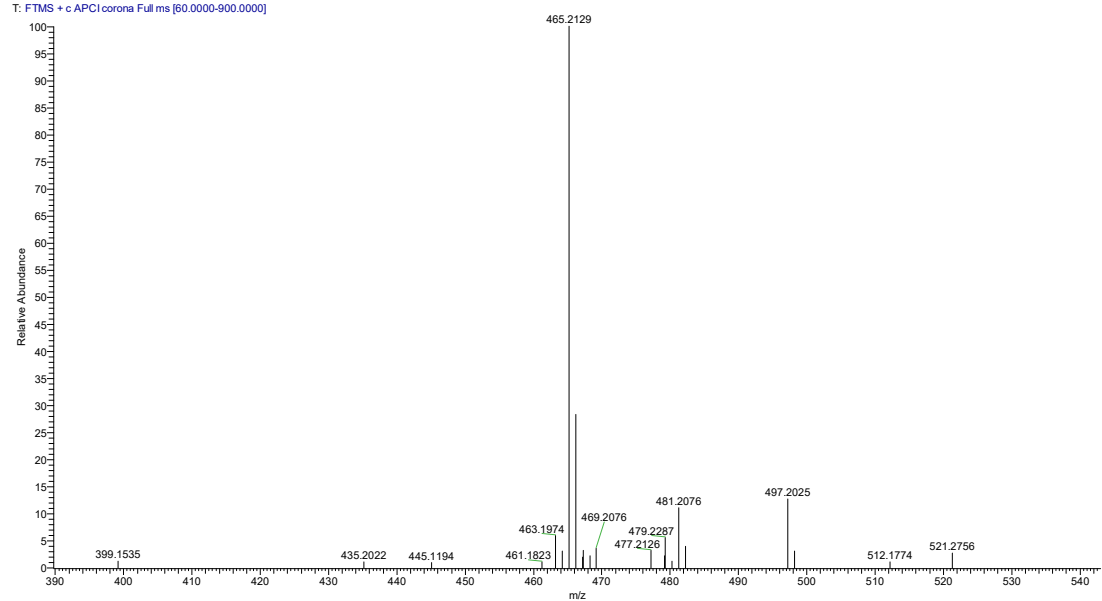

RN-Indole-Pyrazole-4-OCH3. 1. fid

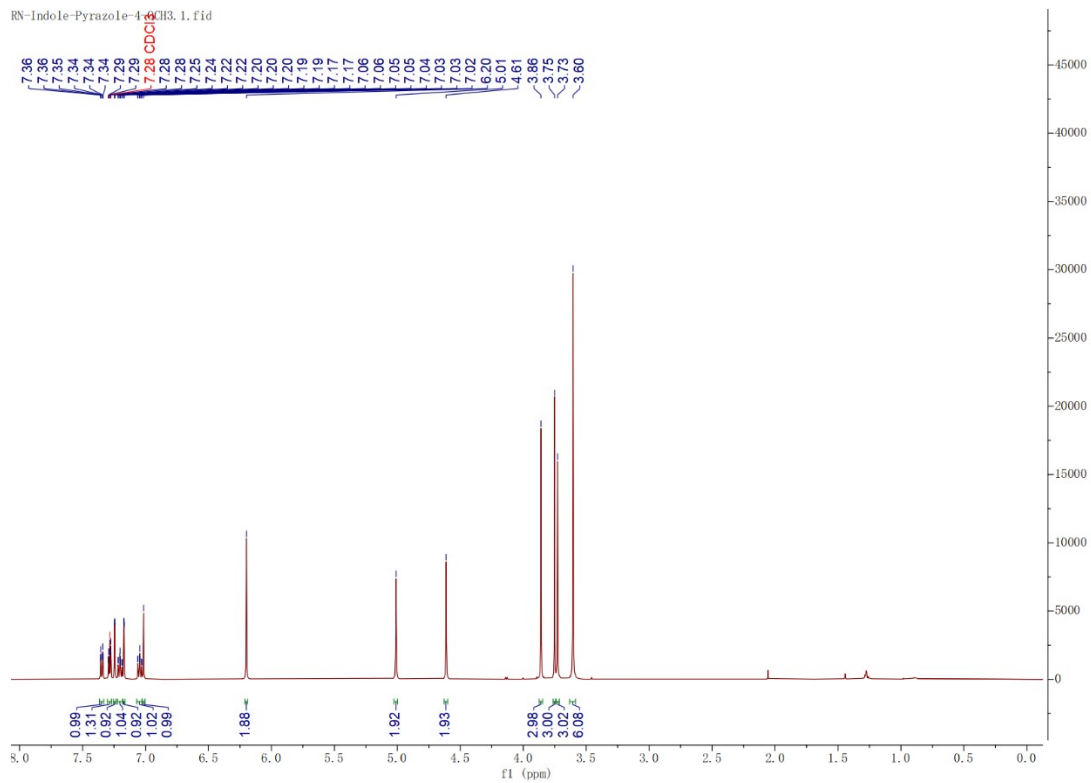

RN-Indole-Pyrazole-4-OCH3. 2. fid

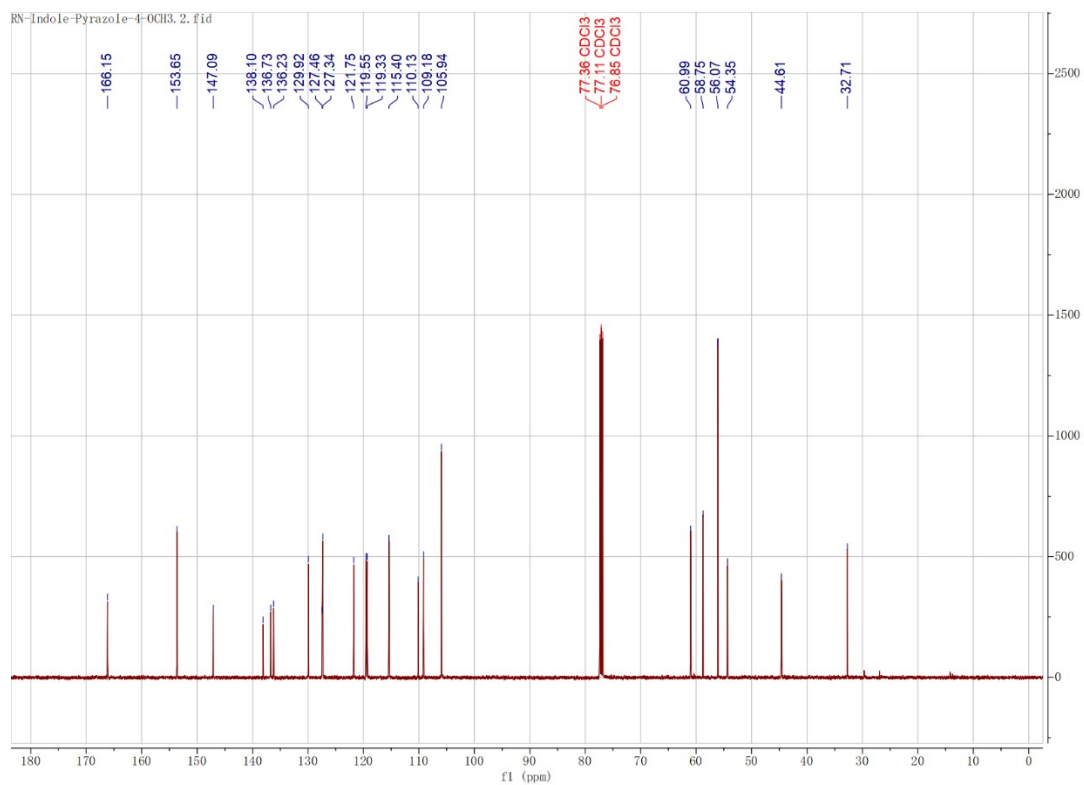

7d :

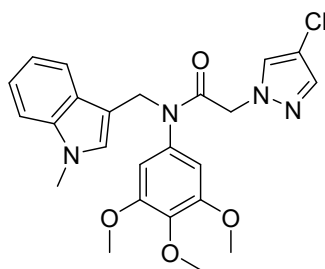

12 #12 RT: 0.12 AV: 1 NL: 1.05E8  
T: FTMS - c APCI corona Full ms [60.0000-900.0000]

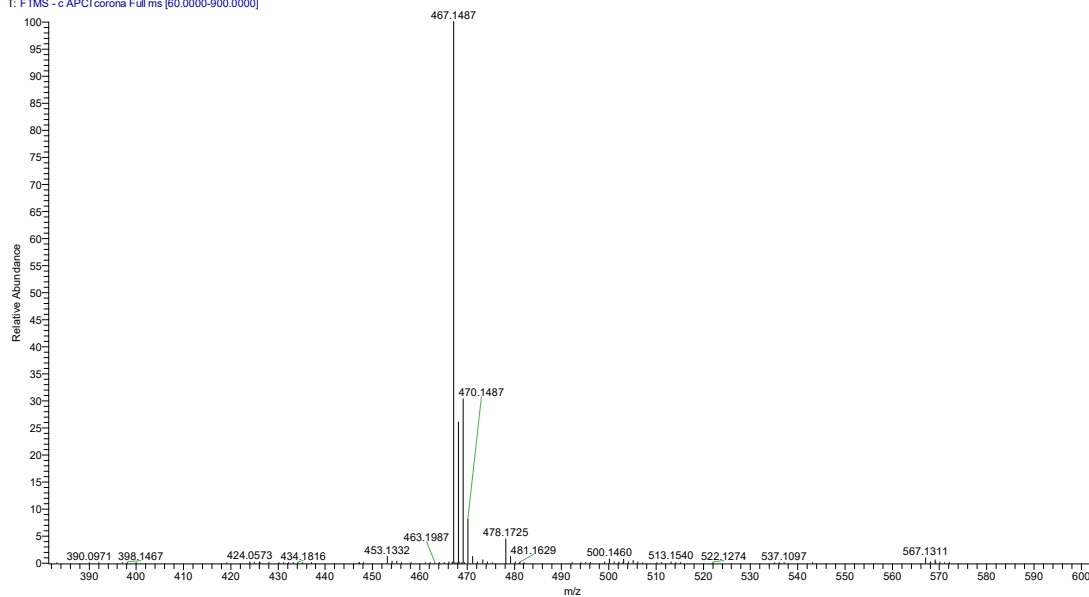

RN-Indole-Pyrazole-4-Cl. F1d

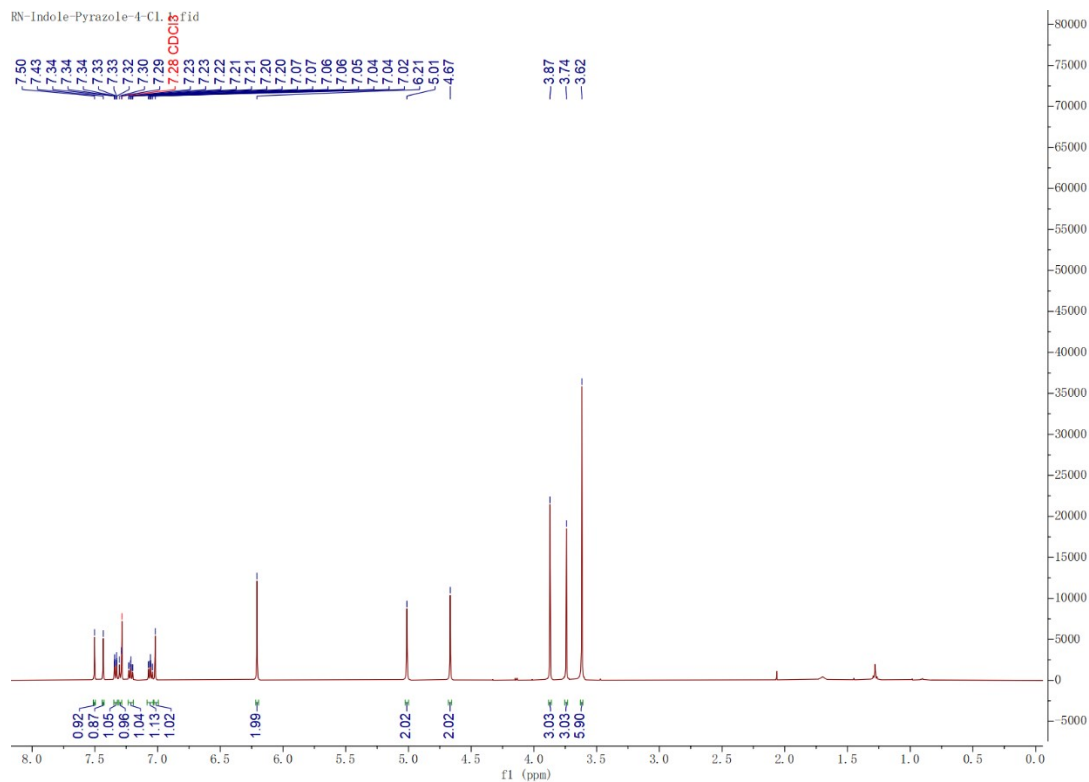

RN-Indole-Pyrazole-4-Cl. 2. fid

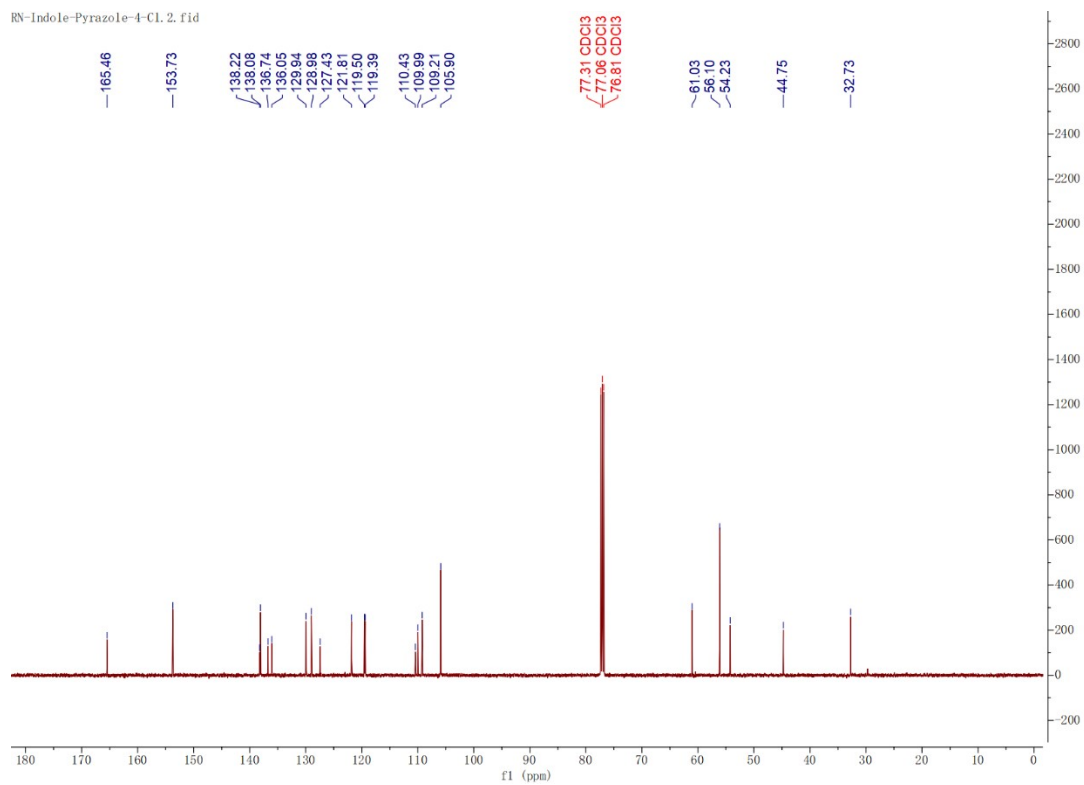

7e :

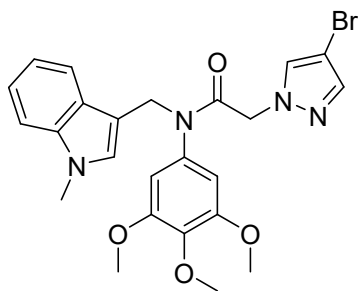

9 #20 RT: 0.20 AV: 1 NL: 9.67E7

T: FTMS - c APCI corona Fullms [60.0000-900.0000]

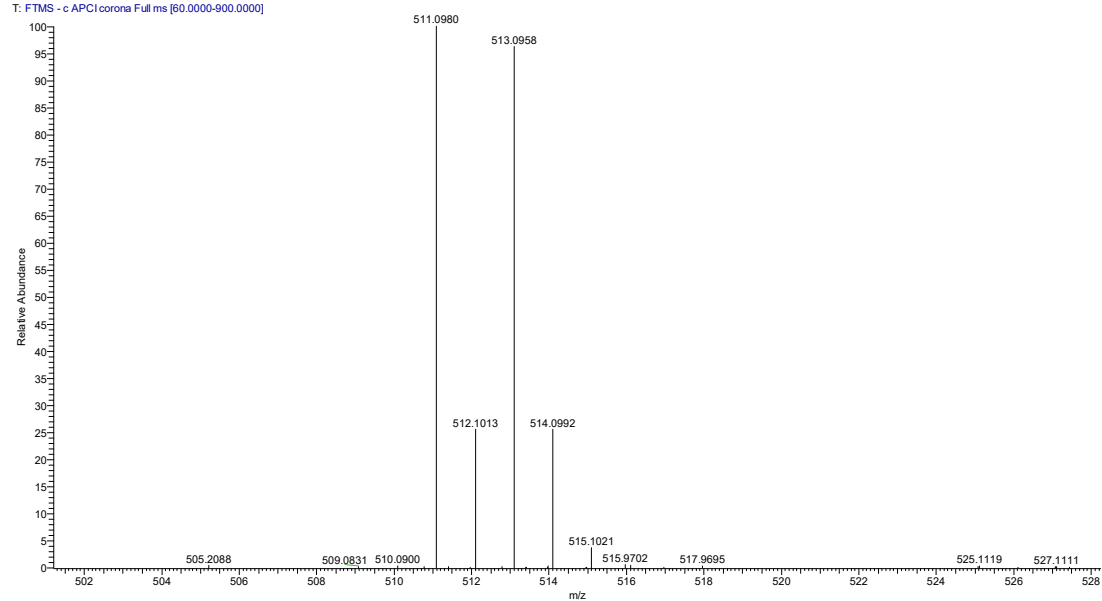

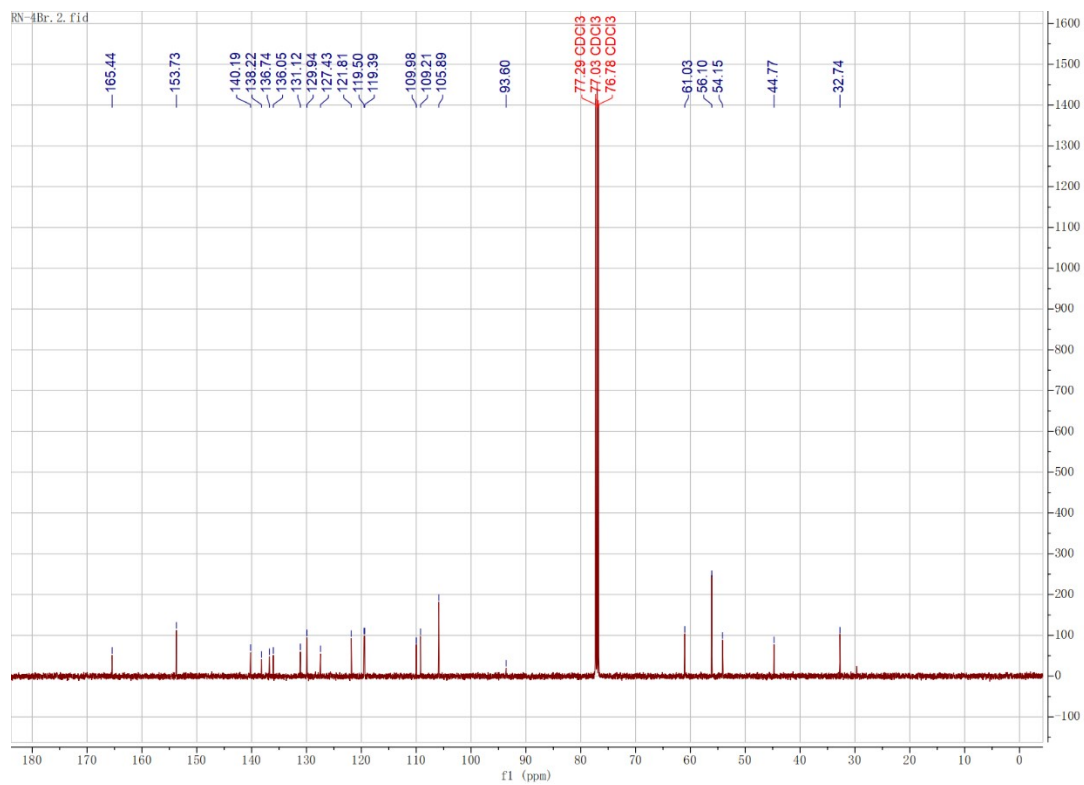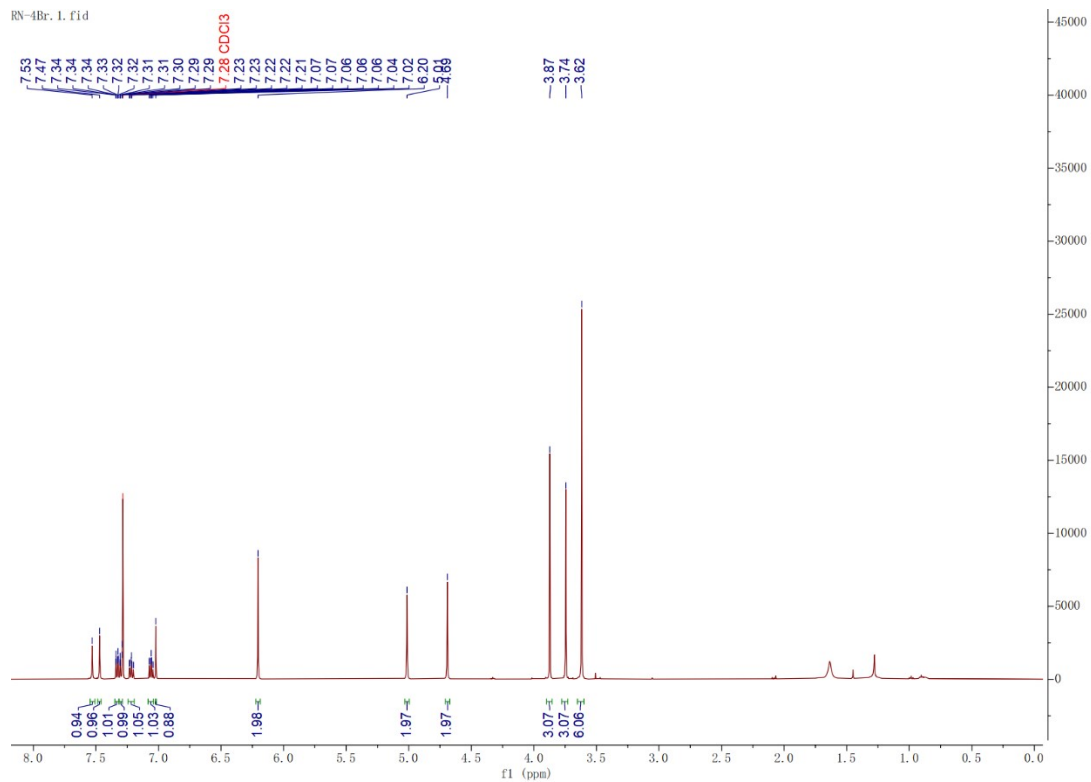

7f :



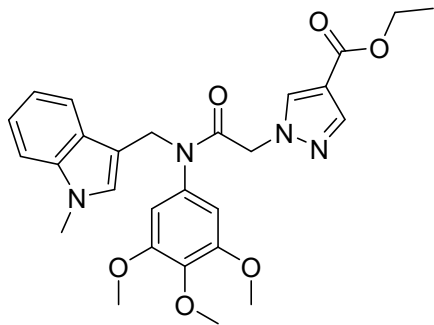

6 #15 RT: 0.15 AV: 1 NL: 1.54E7  
T: FTMS + c APCI corona Full ms [60.0000-900.0000]

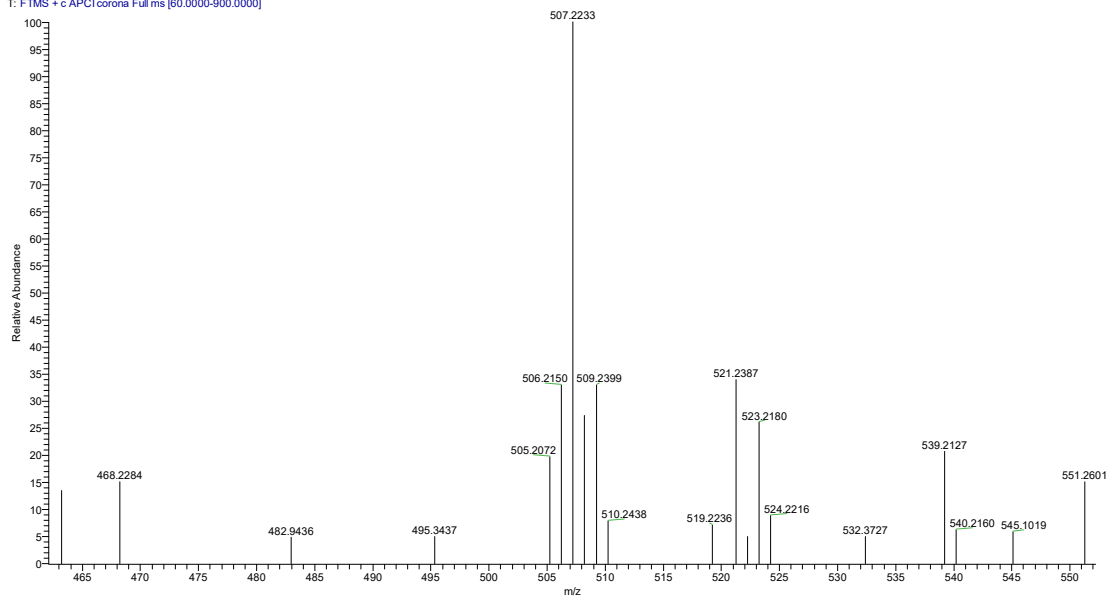

RN-Indole-Pyrazole-4-COOC2H5.c1.fid

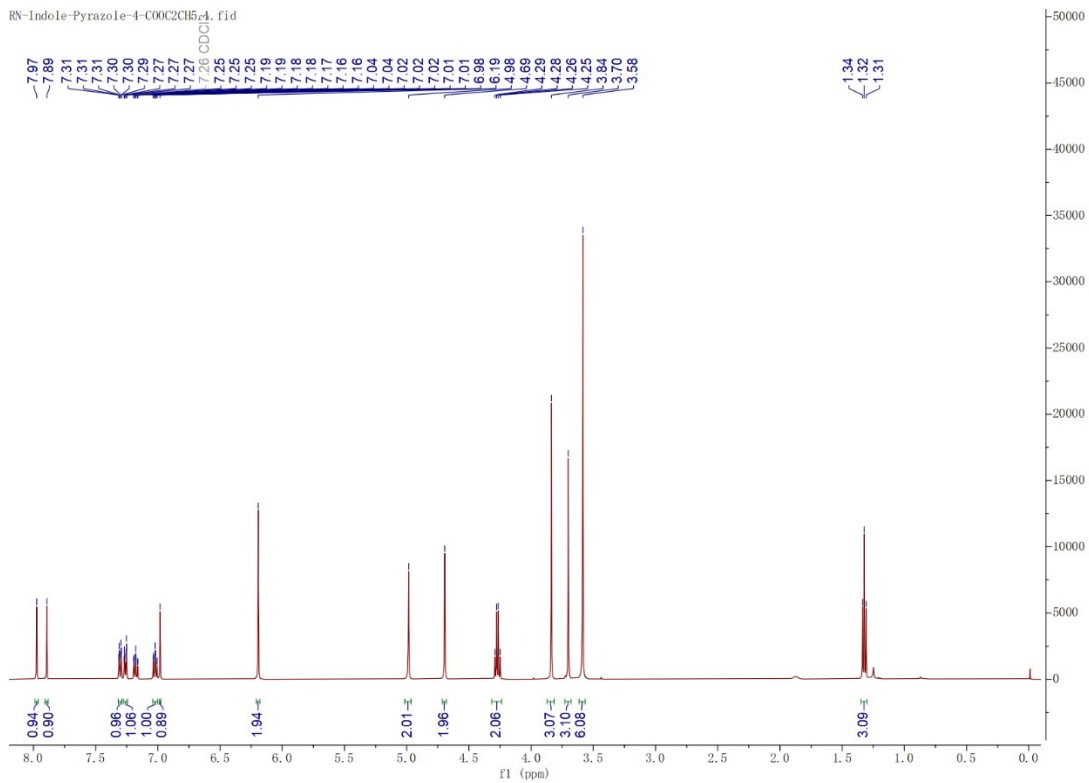

RN-Indole-Pyrazole-4-COOC2H5. 2. fid

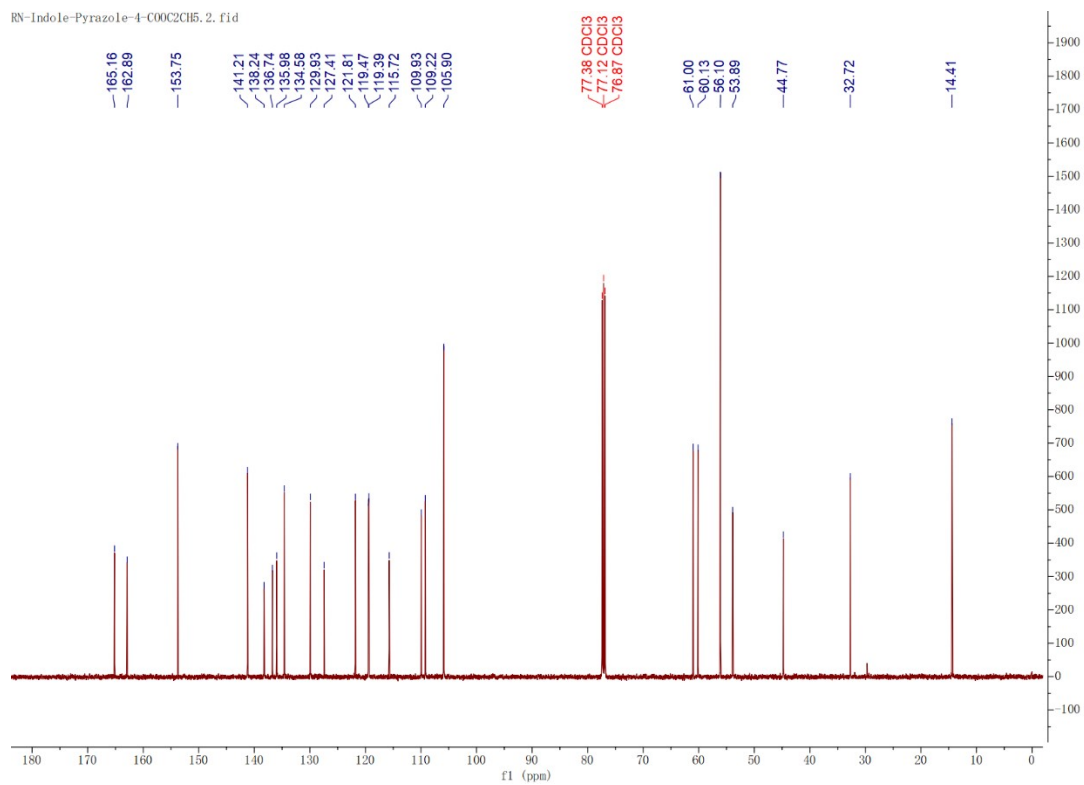

7g :

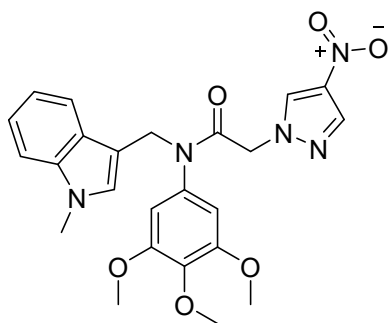

11#12 RT: 0.12 AV: 1 NL: 2.53E9  
T: FTMS - c APCI corona Full ms [0.0000-900.0000]

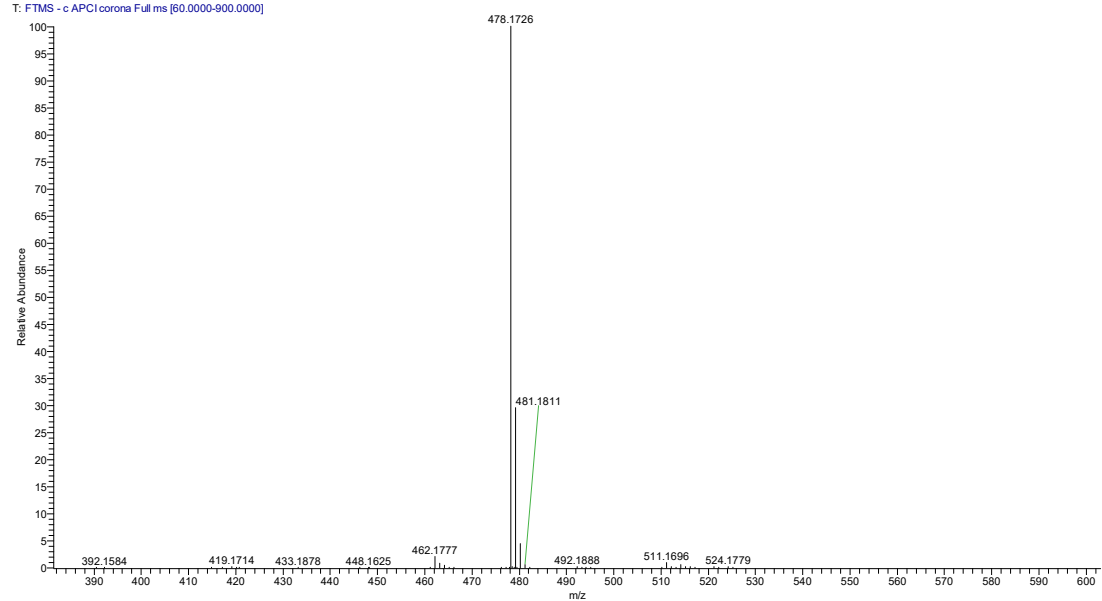

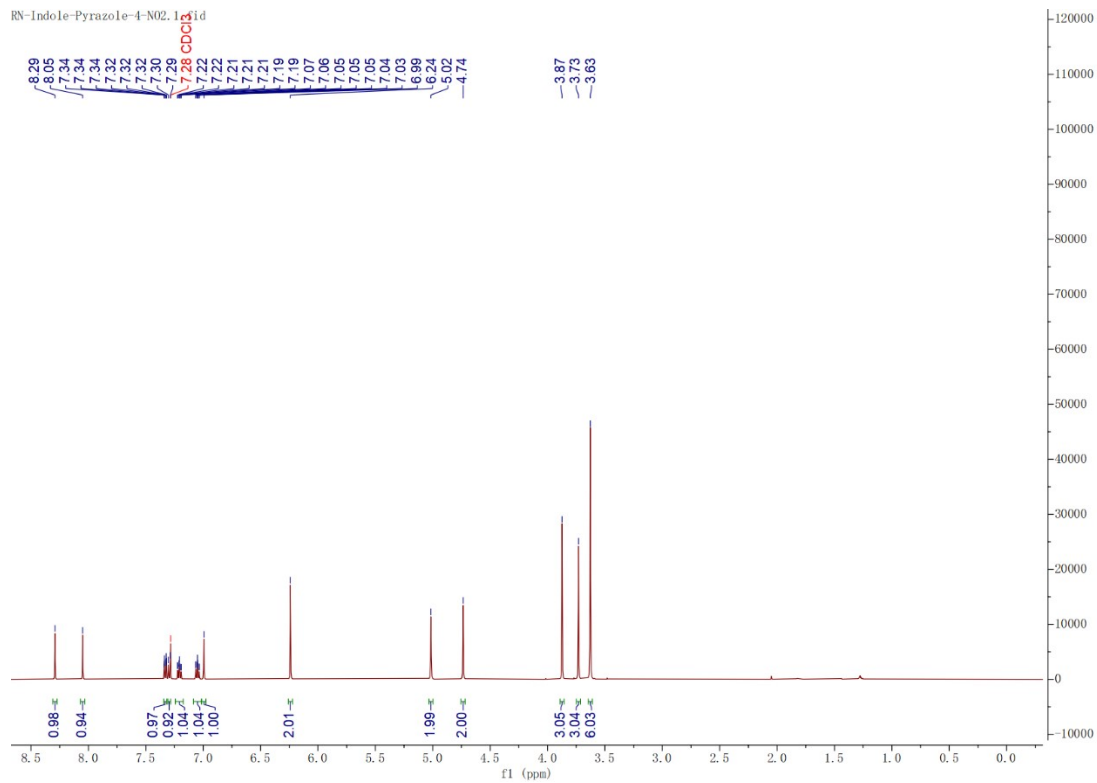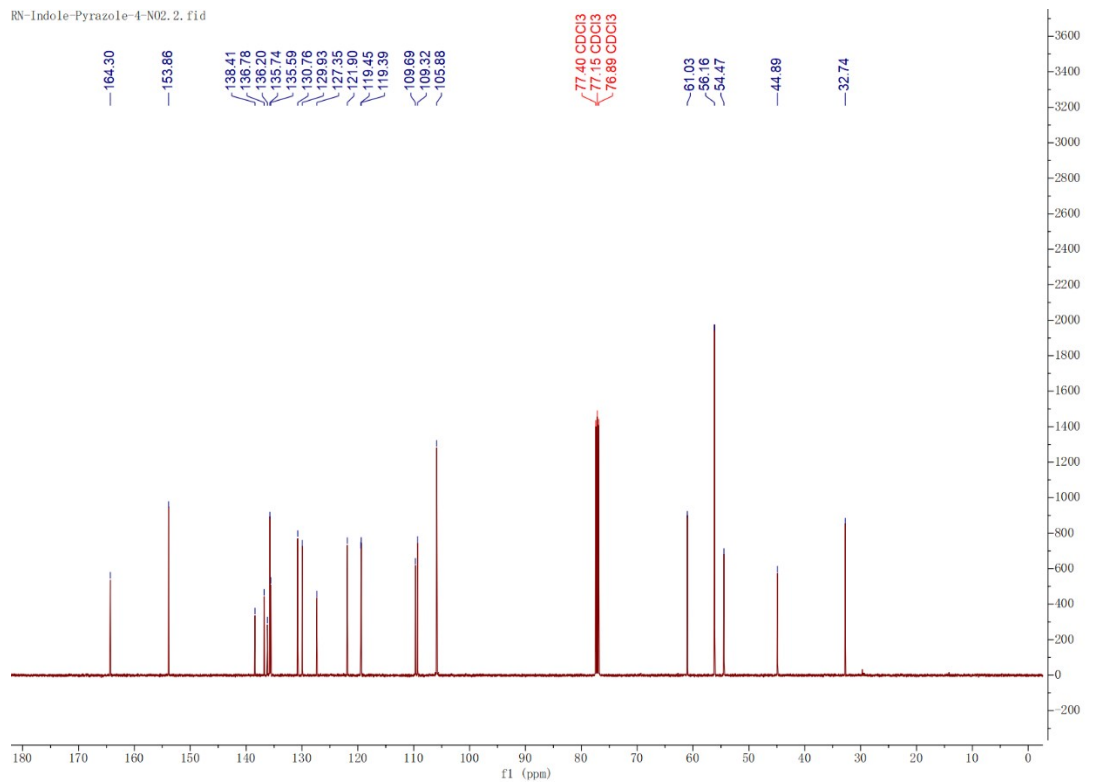

7h :

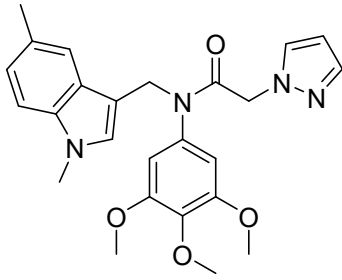

16 #20 RT: 0.20 AV: 1 NL: 3.19E8  
 T: FTMS - c APCI corona Full ms [60.0000-900.0000]

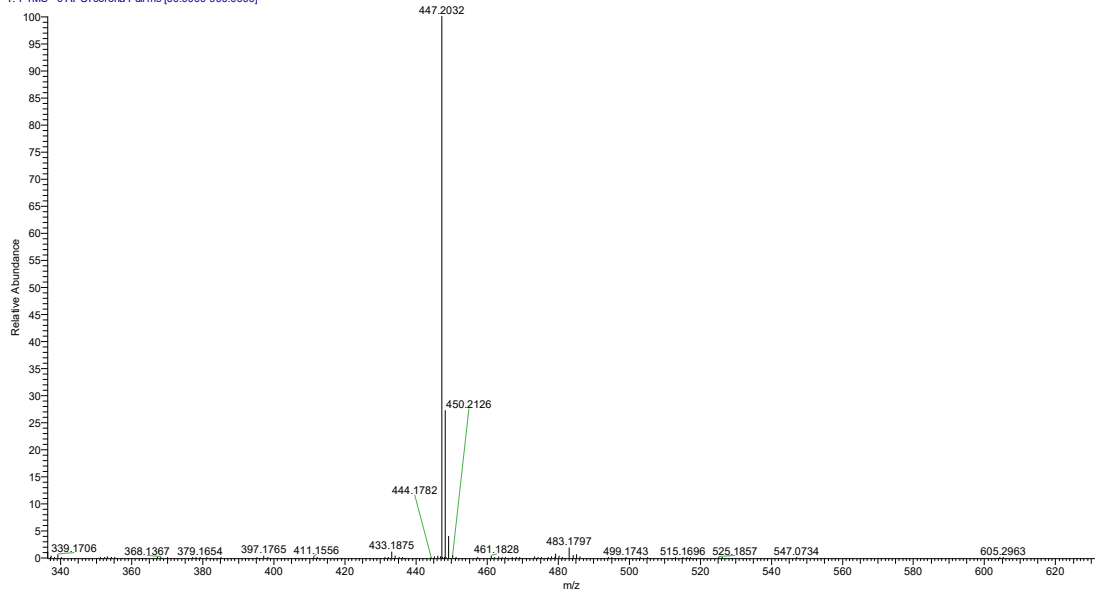

RN-5-CH3-Indole-Pyrazole.1.fid

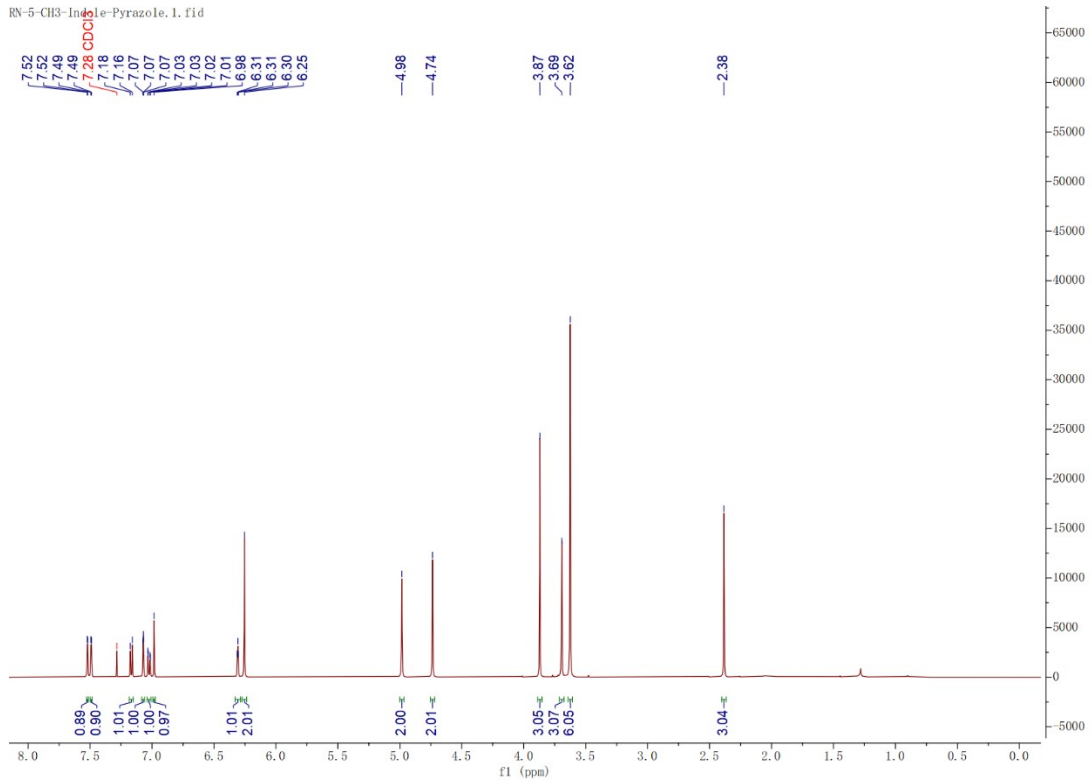

RN-5-CH3-Indole-Pyrazole.2.fid

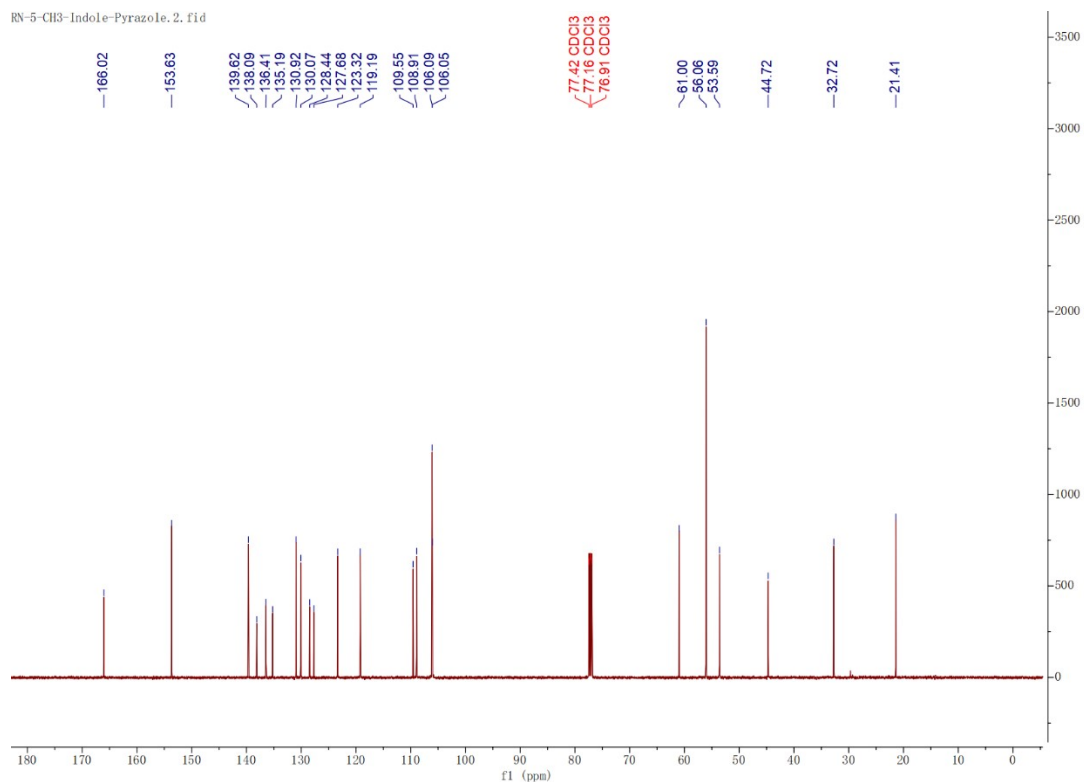

7i :

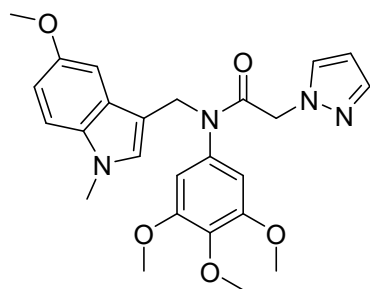

15 #20 RT: 0.20 AV: 1 NL: 5.50E8  
T: FTMS - c APCLcorona Full.ms [60.0000-900.0000]

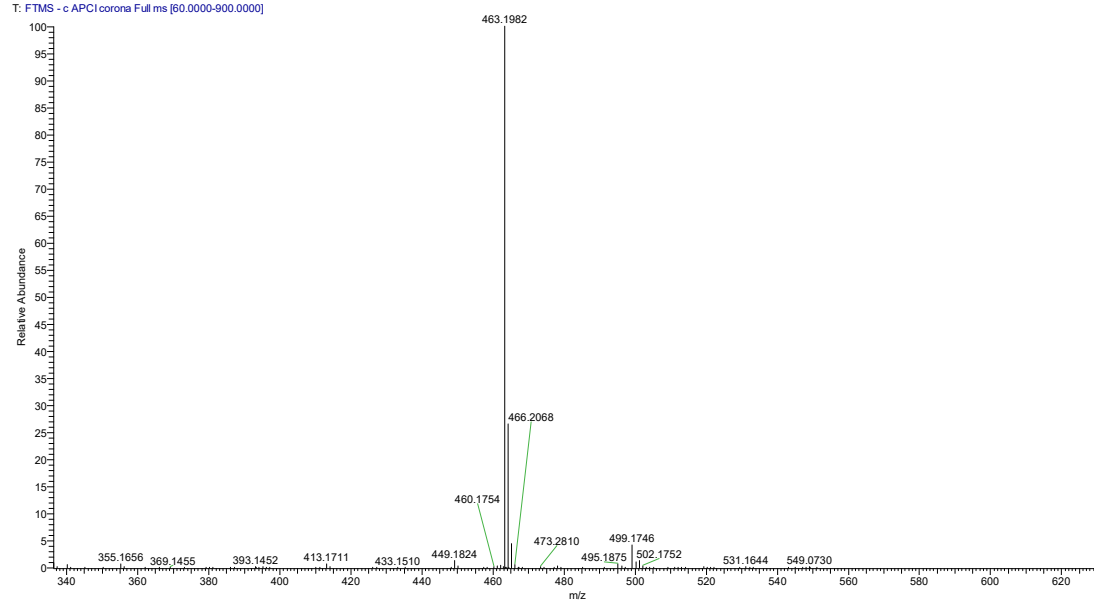

RN-5-OCH3-indole-Pyrazole. 1. fid

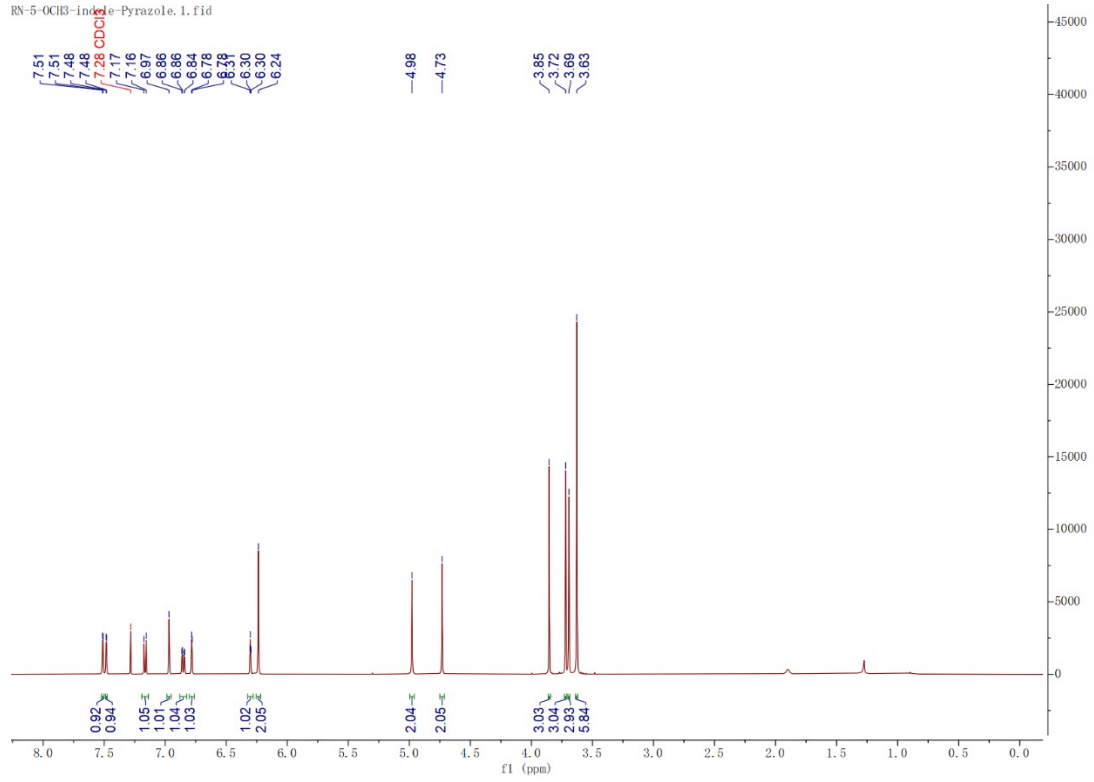

RN-5-OCH3-indole-Pyrazole. 2. fid

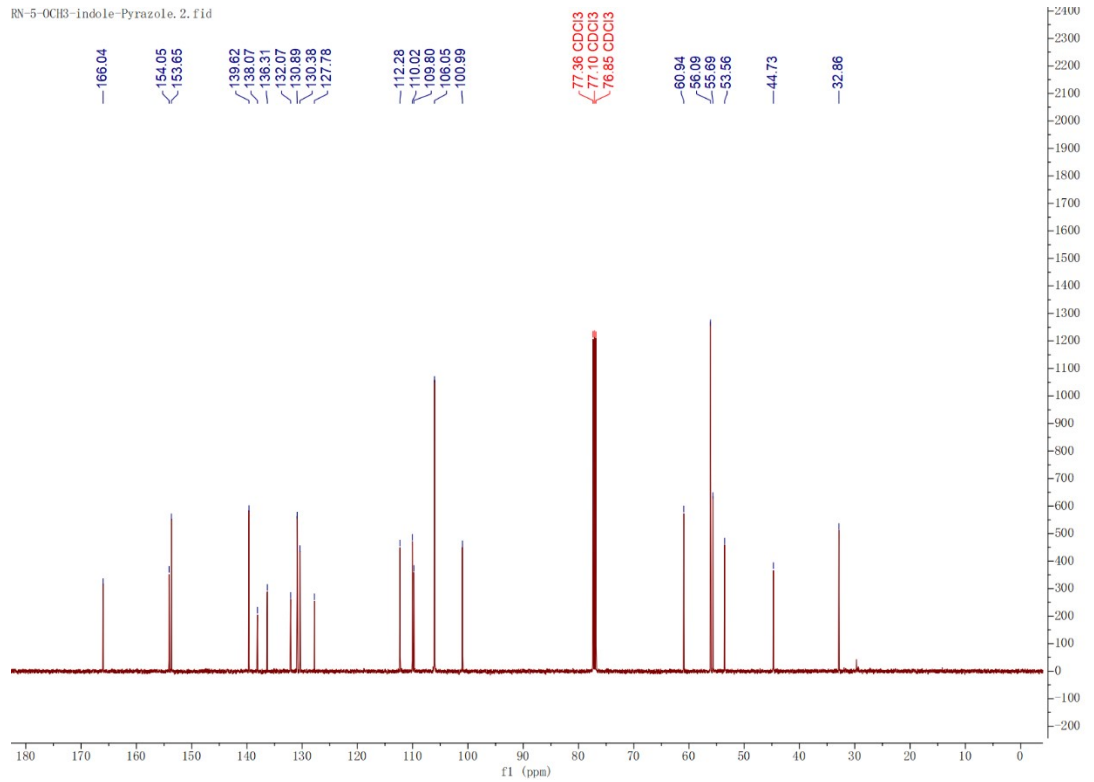

7j :

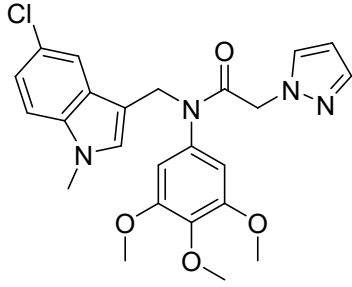

13 #12 RT: 0.12 AV: 1 NL: 2.30E8  
T: FTMS - c APCI corona Full ms [60.0000-900.0000]

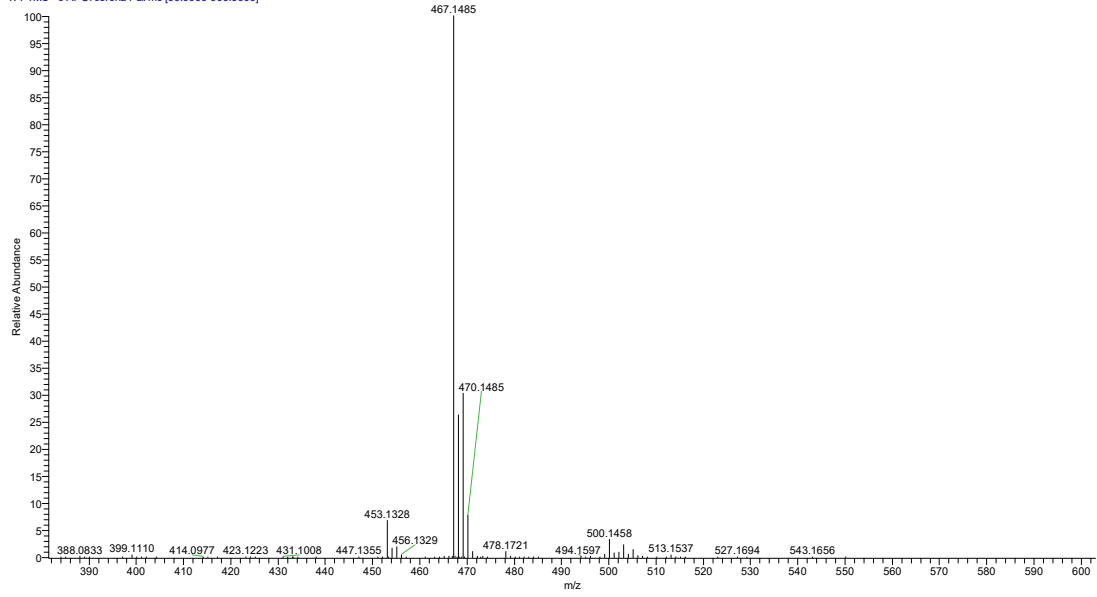

RN-5-Cl-indole-Pyrazole. 1. fid

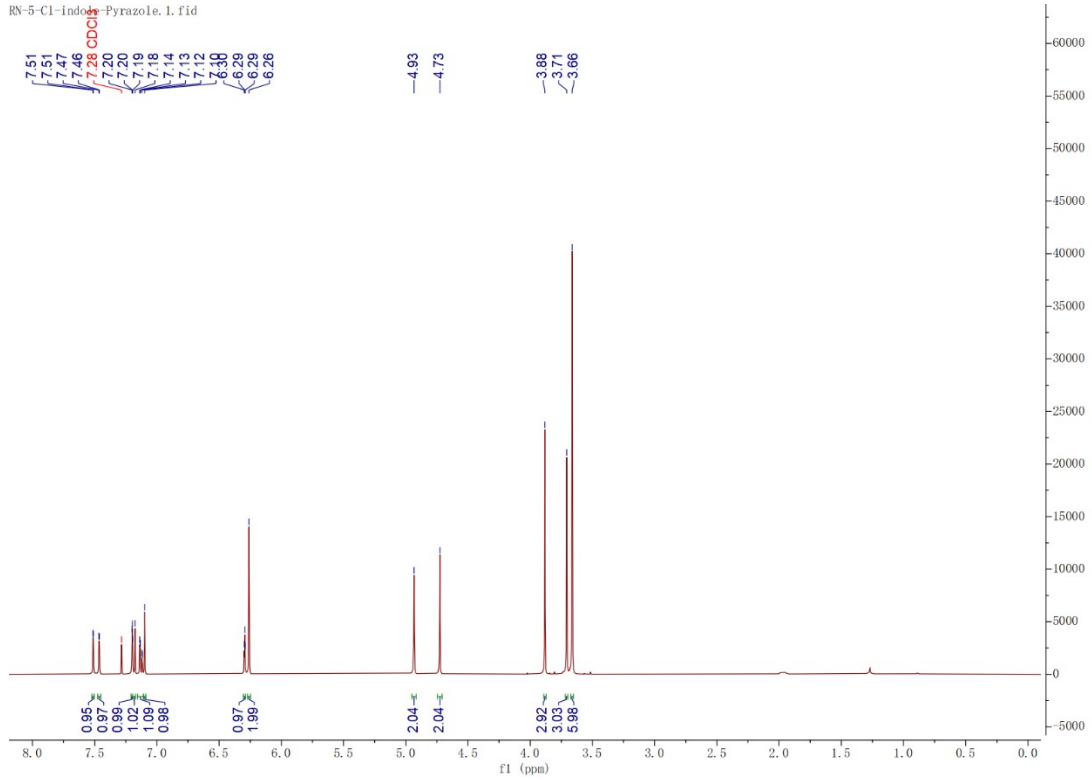

RN-5-Cl-indole-Pyrazole. 2. fid

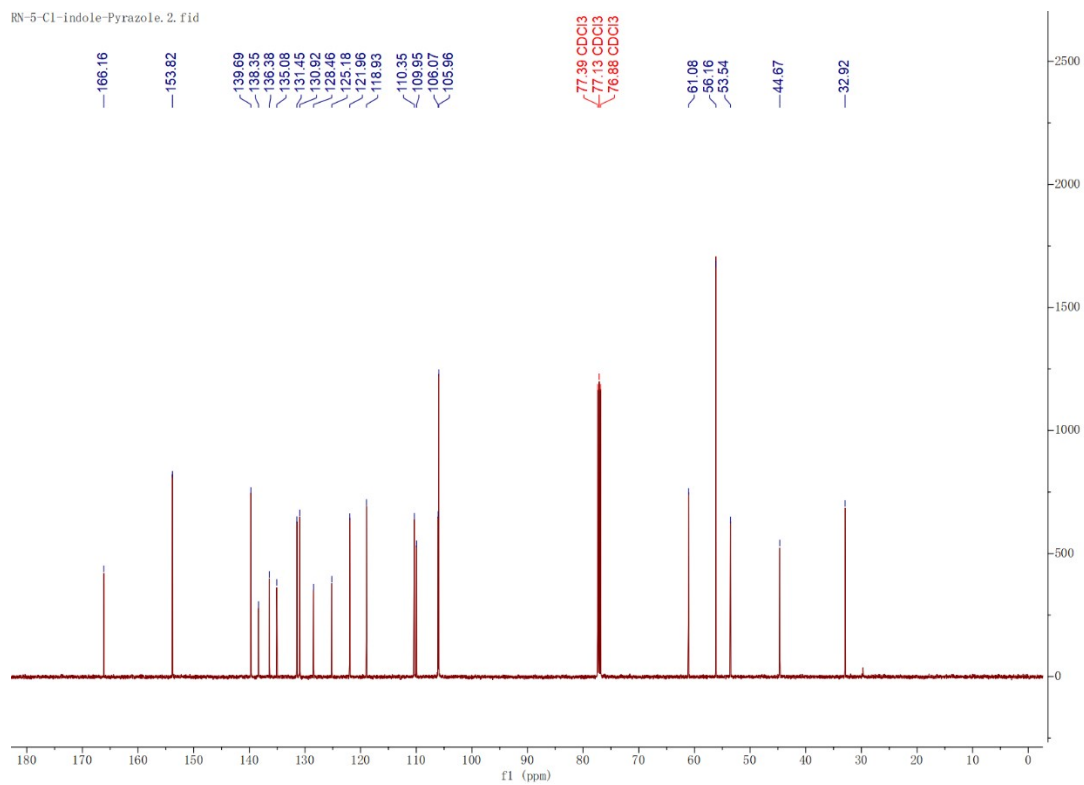

7k :

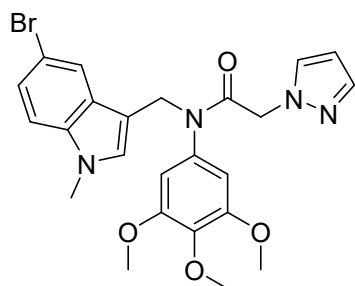

14 #20 RT: 0.20 AV: 1 NL: 2.03E8

T: FTMS - c APCLcorona Full.ms [60.0000-900.0000]

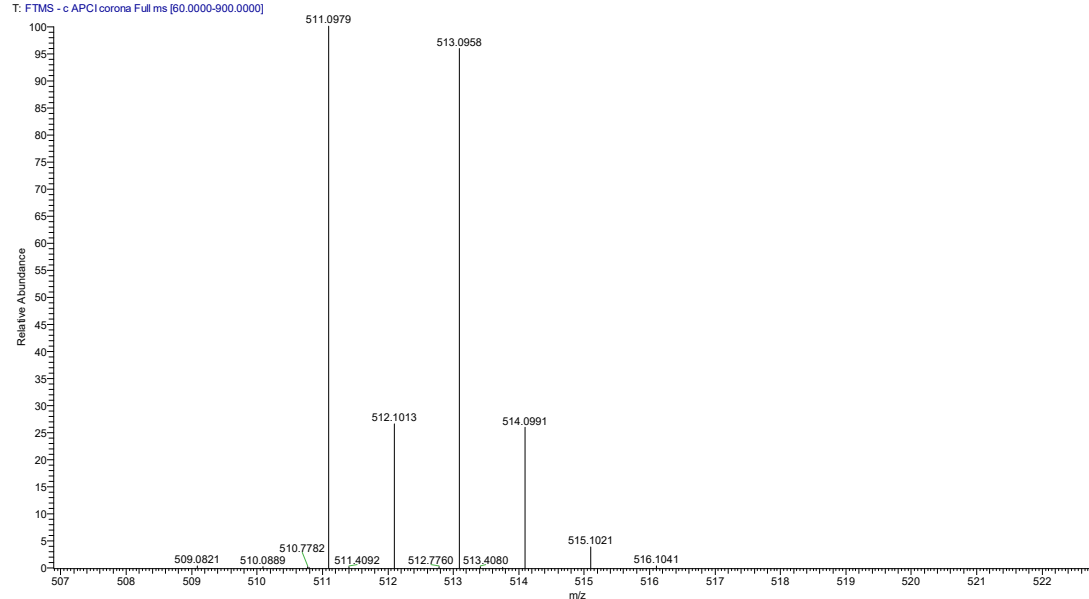



RN-5-Br-indole-Pyrazole. 1. fid

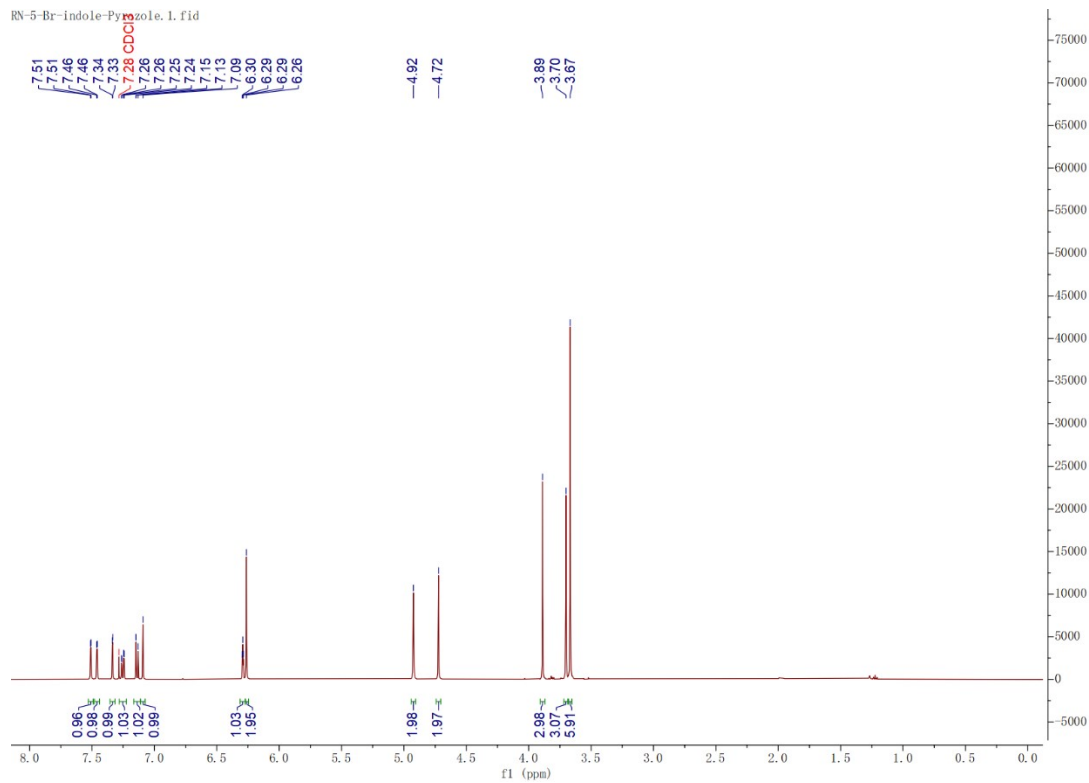

RN-5-Br-indole-Pyrazole. 2. fid

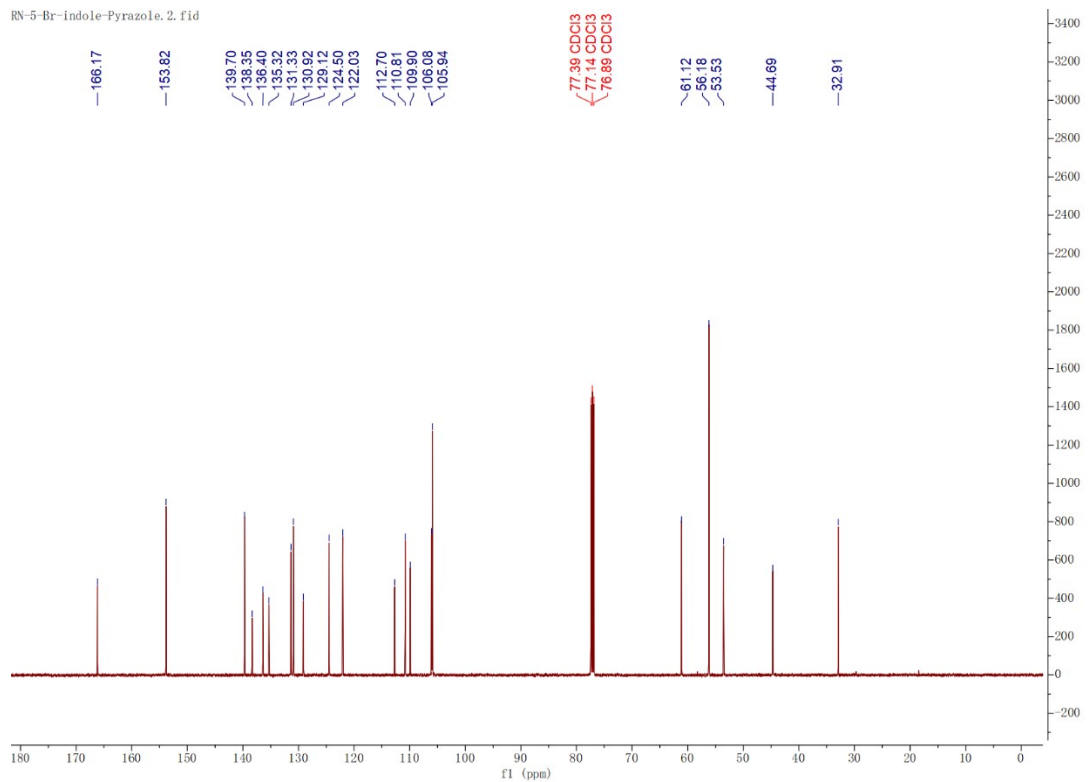

71 :

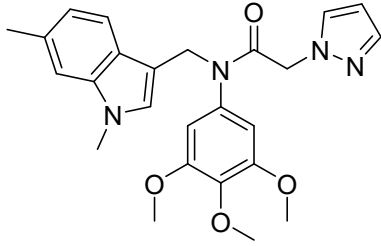

17 #20 RT: 0.20 AV: 1 NL: 1.03E8  
 T: FTMS - c APCI corona Full ms [60.0000-900.0000]

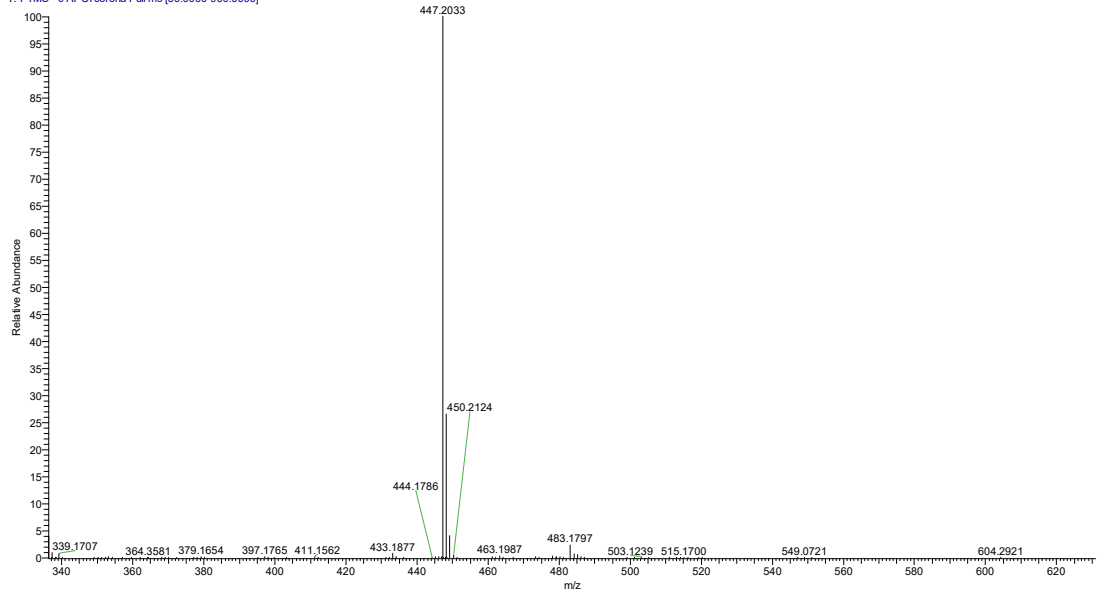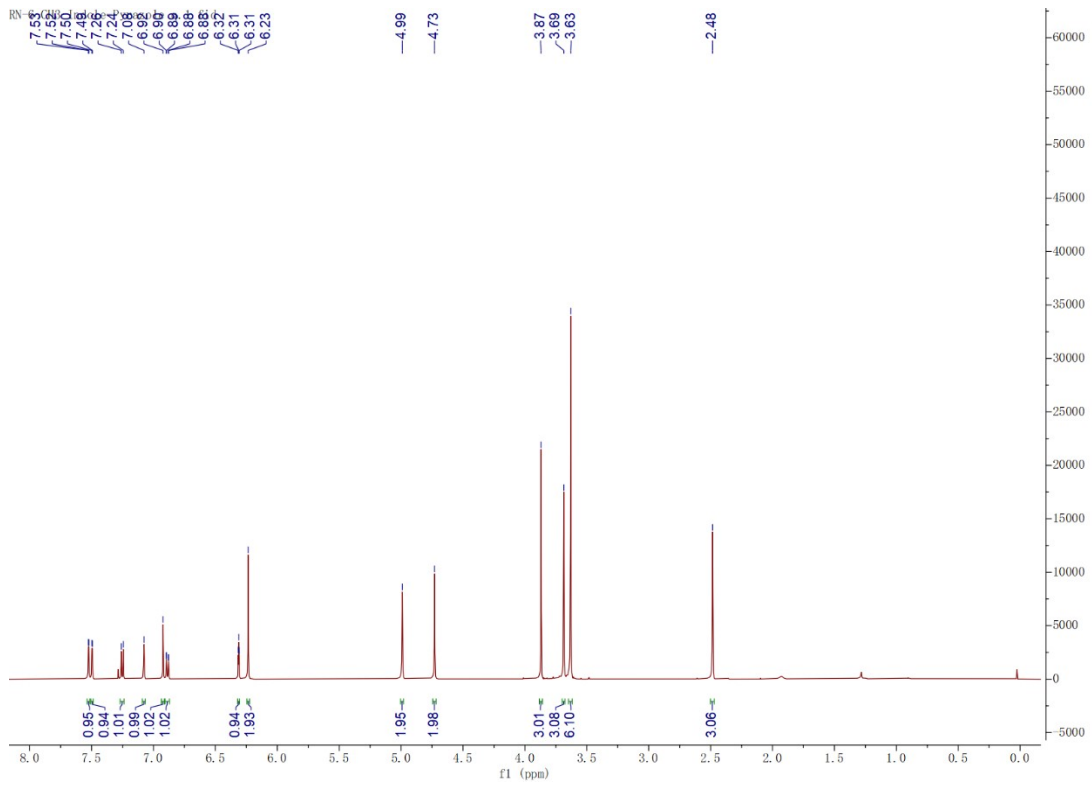

RN-6-CH3-Indole-Pyrazole q.2.fid

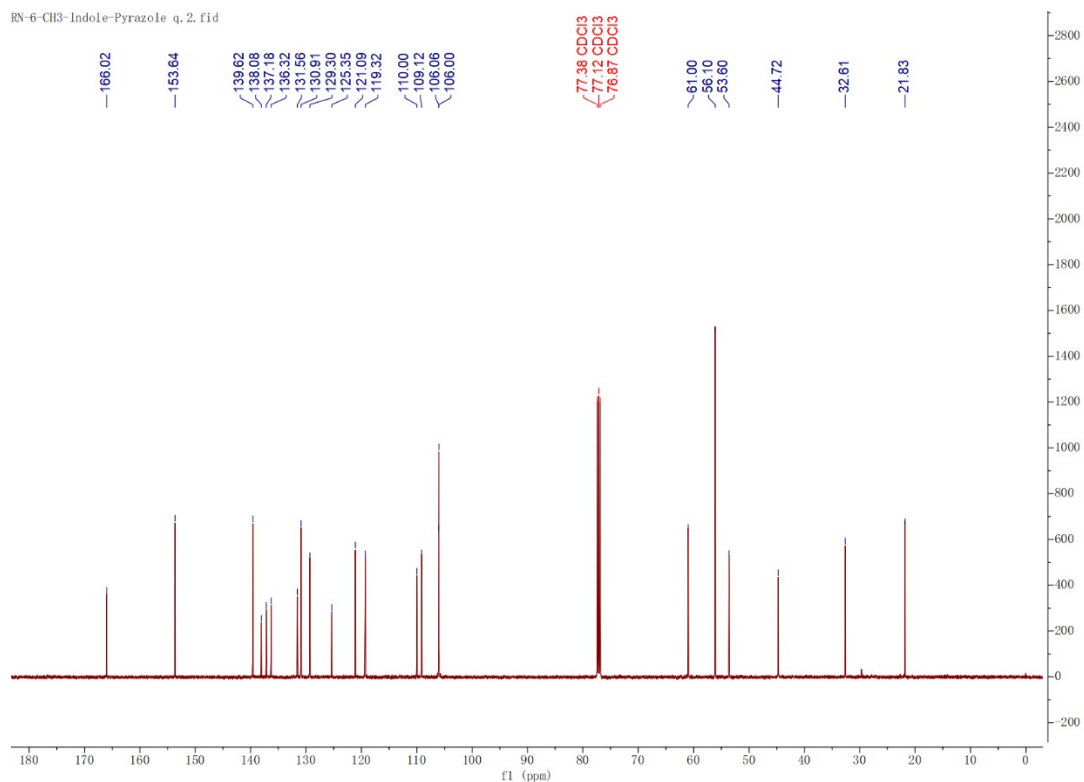

7m :

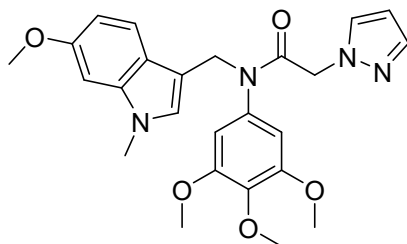

20 #18 RT: 0.19 AV: 1 NL: 9.73E4  
T: FTMS - c APCI corona Full ms [60.0000-900.0000]

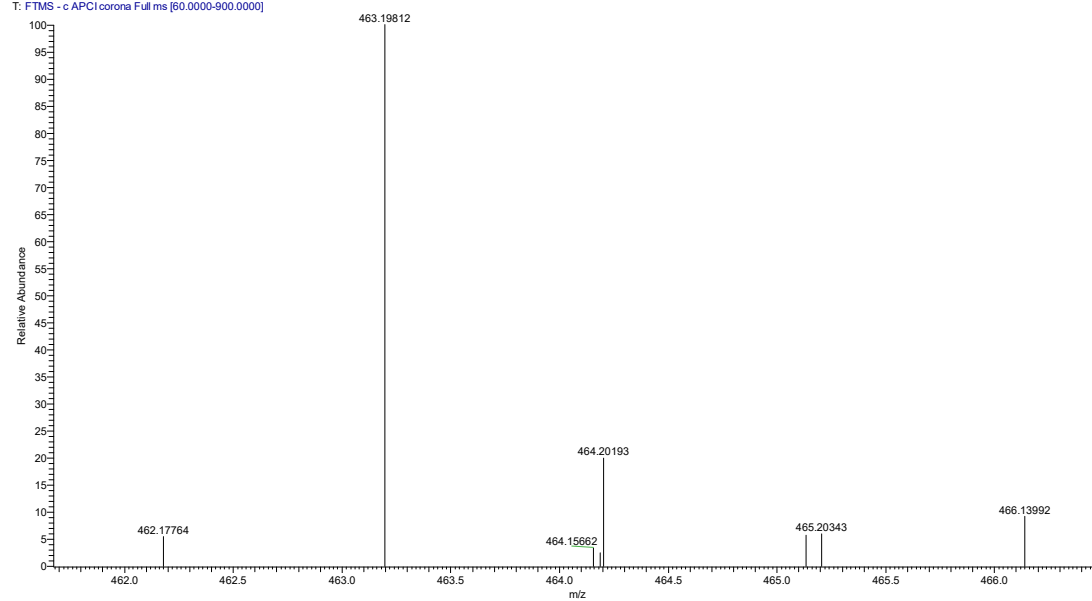

RN-6-OCH3-Indole-Pyrazole.1.fid

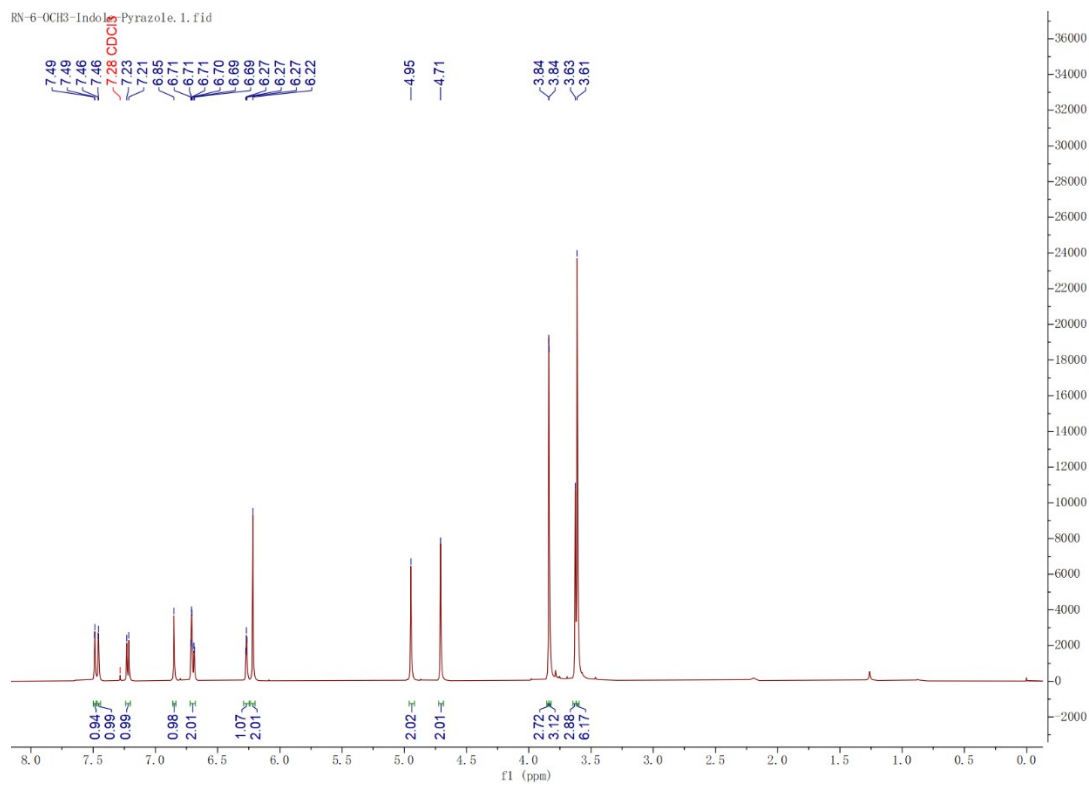

RN-6-OCH3-Indole-Pyrazole.2.fid

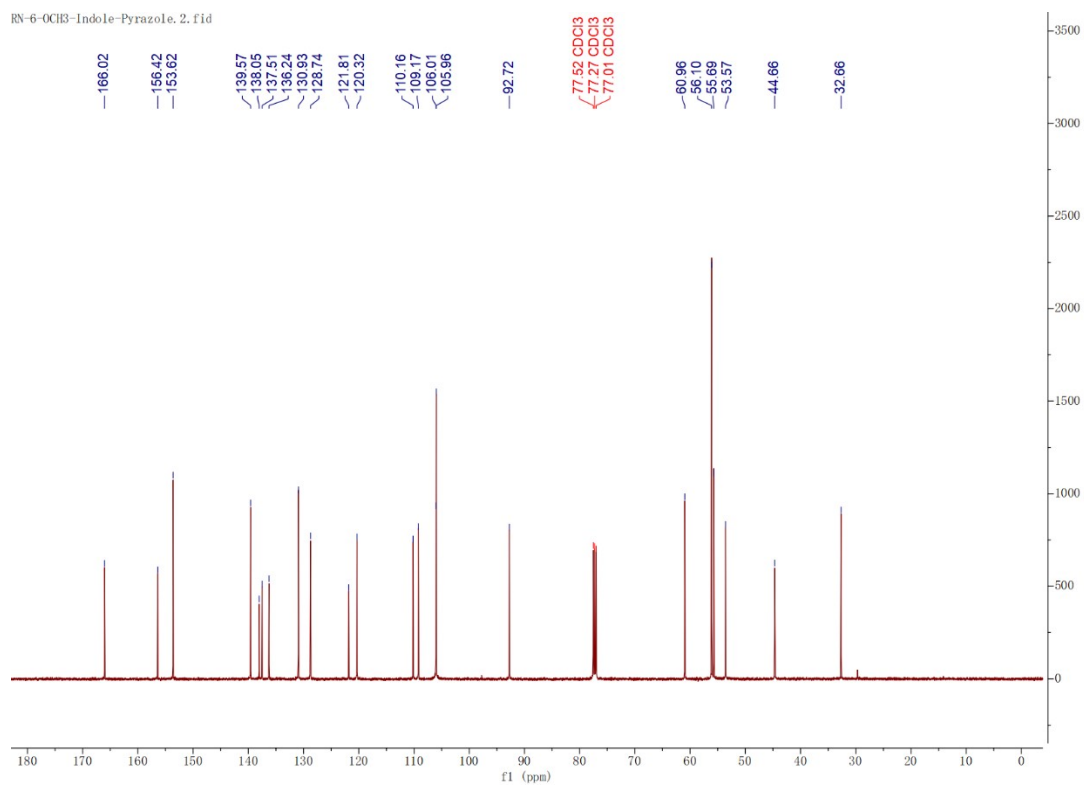

7n :

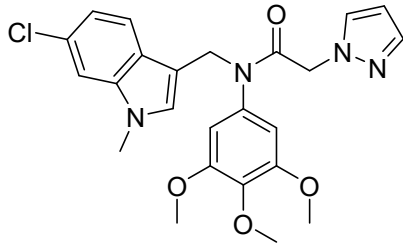

19 #20 RT: 0.20 AV: 1 NL: 2.49E8  
 T: FTMS - c APCI corona Full ms [60.0000-900.0000]

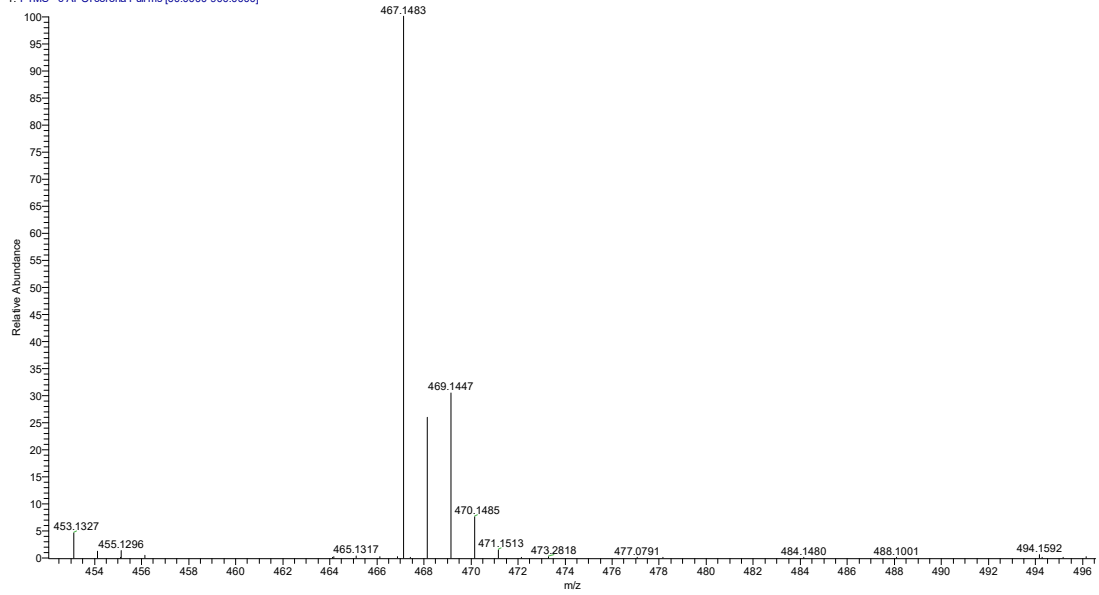

RN-6-Cl-imidazole-Pyrazole. 1. fid

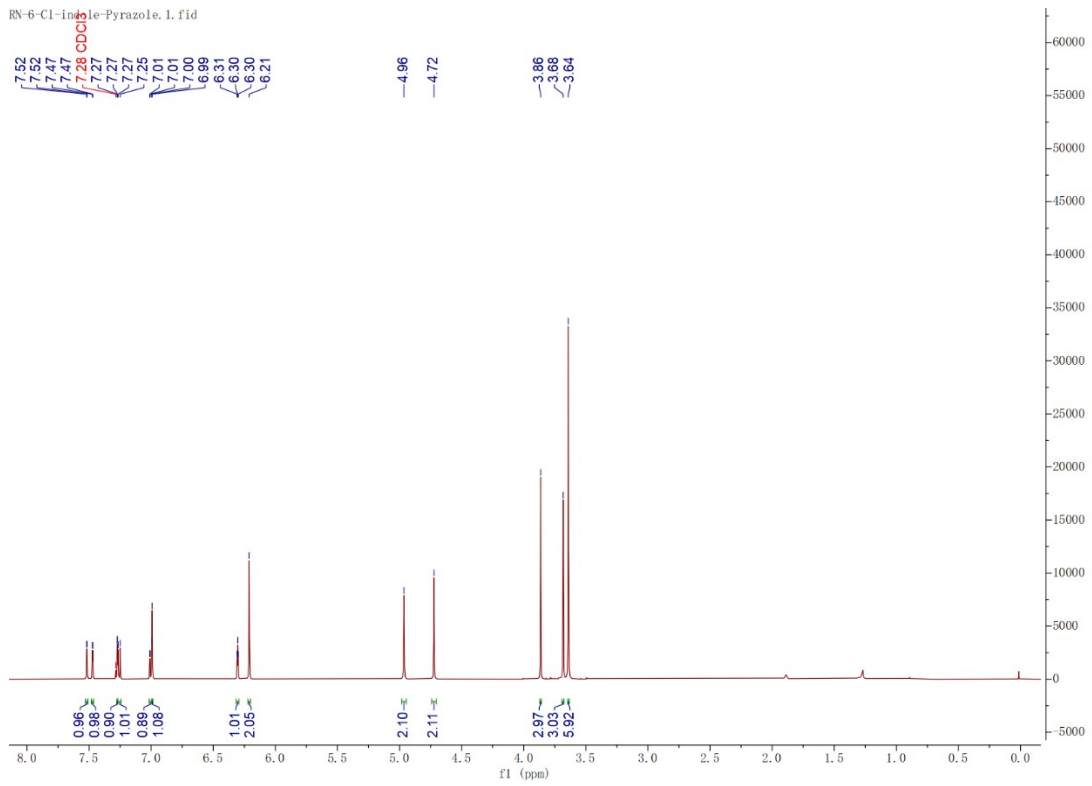

RN-6-Cl-indole-Pyrazole. 2. fid

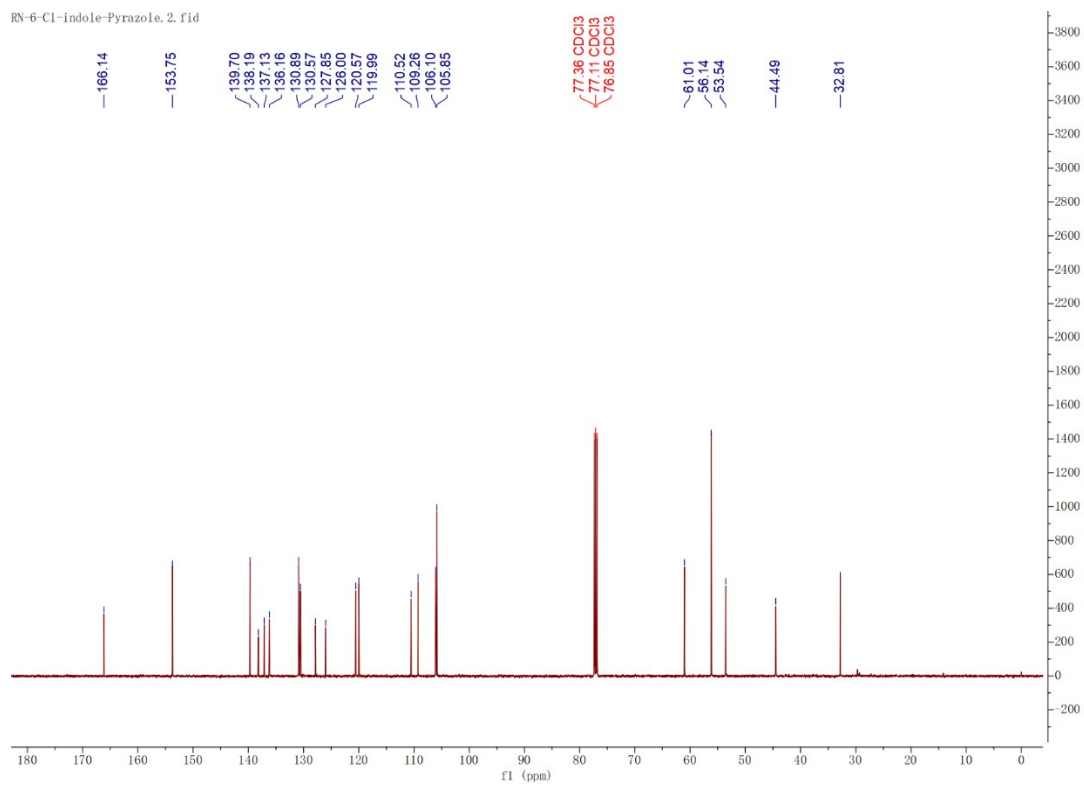

7o :

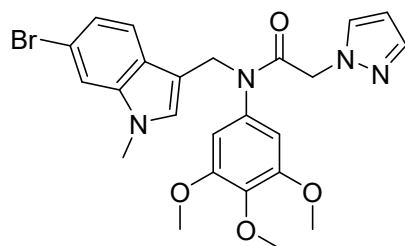

18 #16 RT: 0.16 AV: 1 NL: 8.84E7  
T: FTMS - c APCI corona Full ms [60.0000-900.0000]

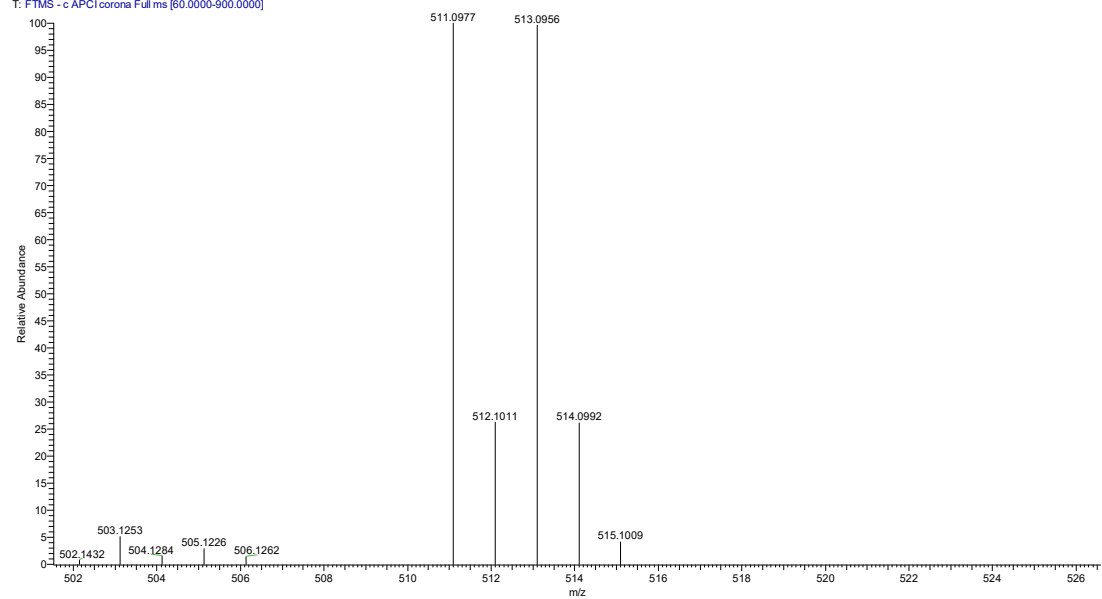

RN-6-Br-Indole-Pyrazole. 1. fid

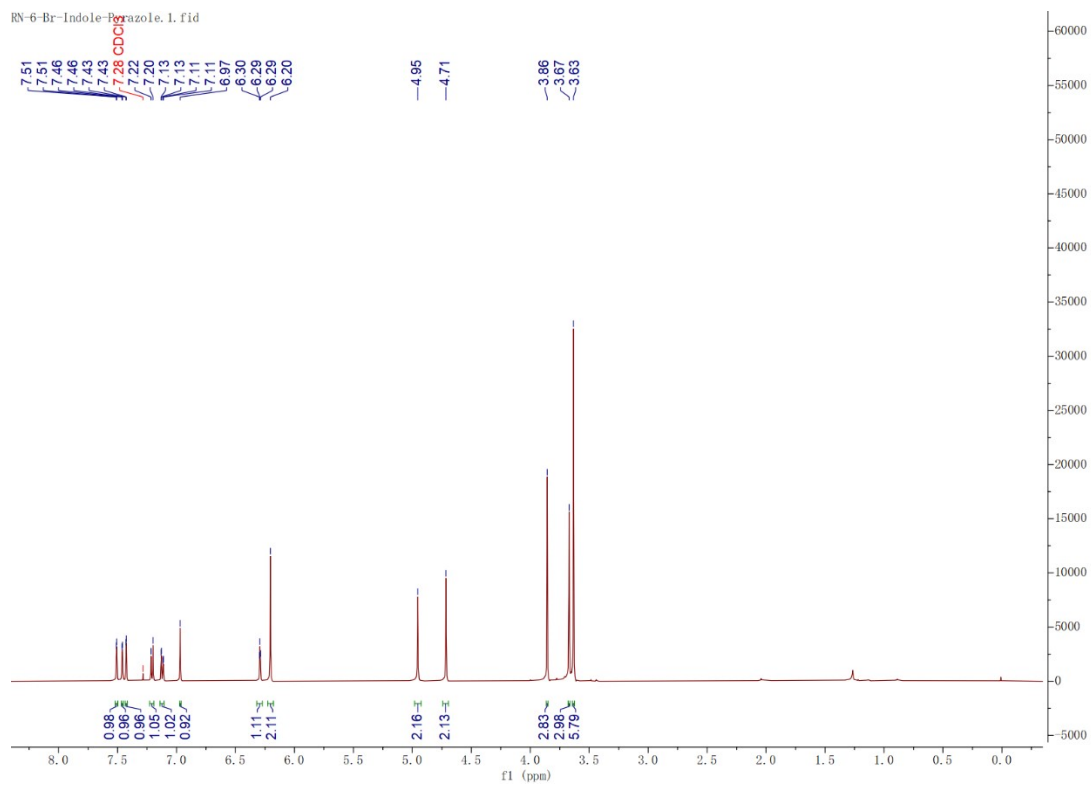

RN-6-Br-Indole-Pyrazole. 2. fid

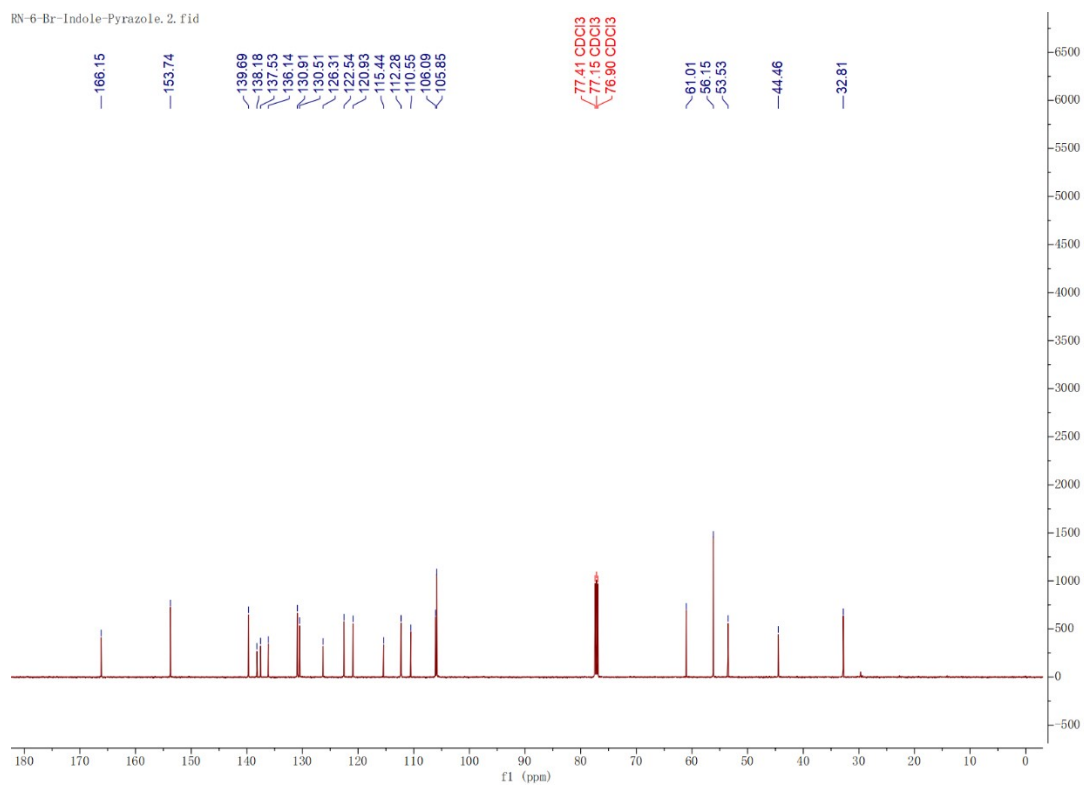

7p :





RN-indole-1, 2, 4-Triazole.2.fid

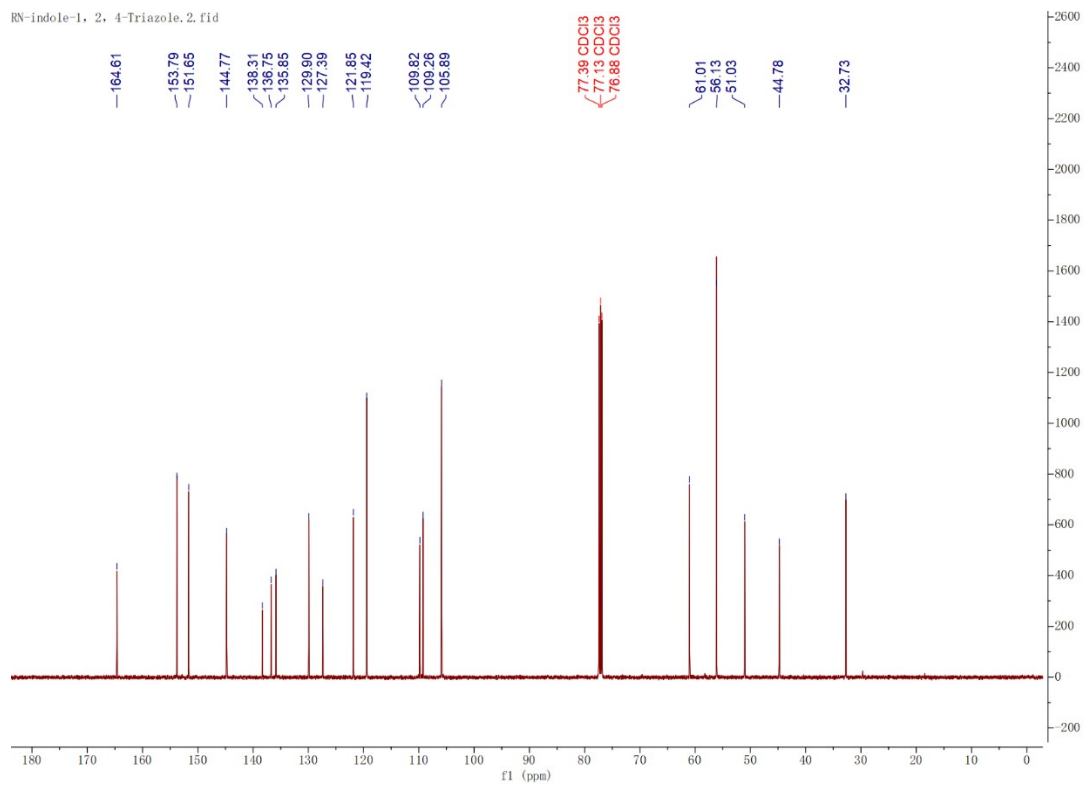

7q :

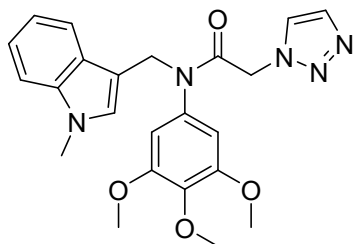

1 #20 RT: 0.20 AV: 1 NL: 3.43E8  
T: FTMS - c APCI corona Full ms [60.0000-900.0000]

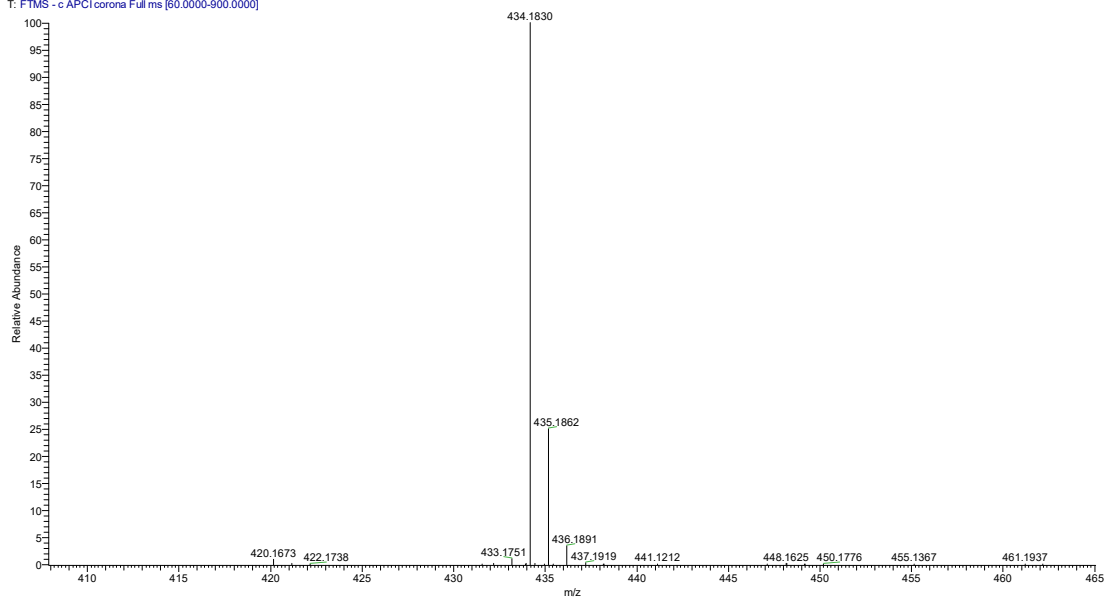

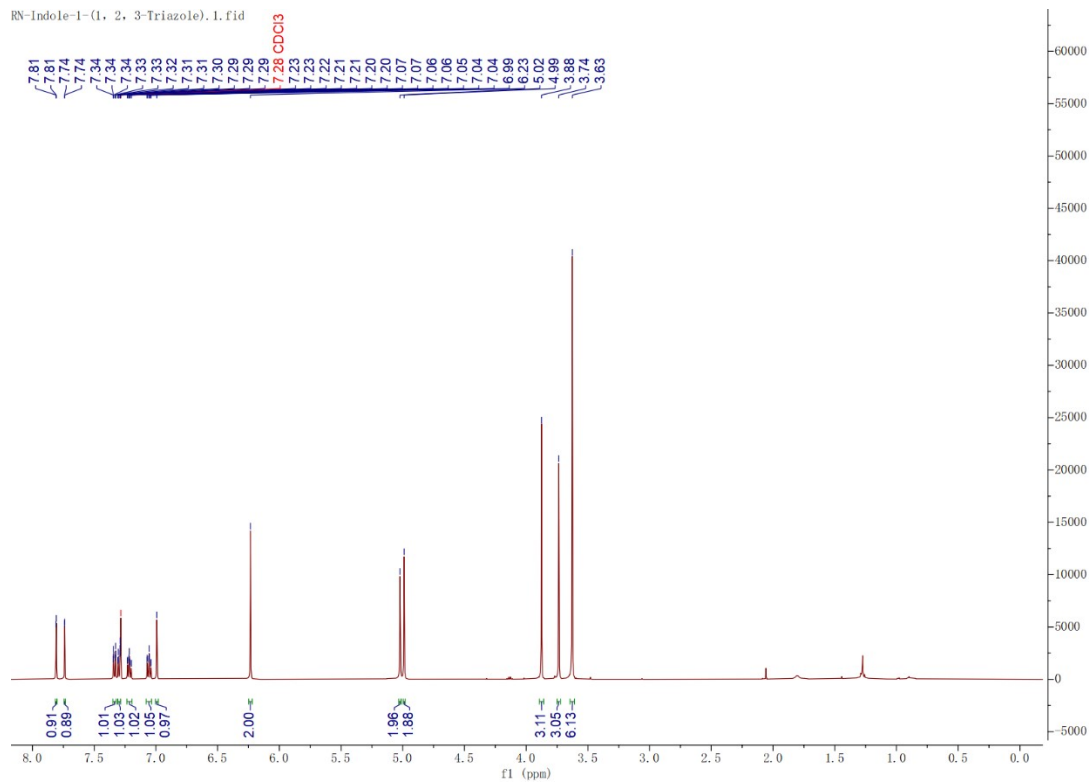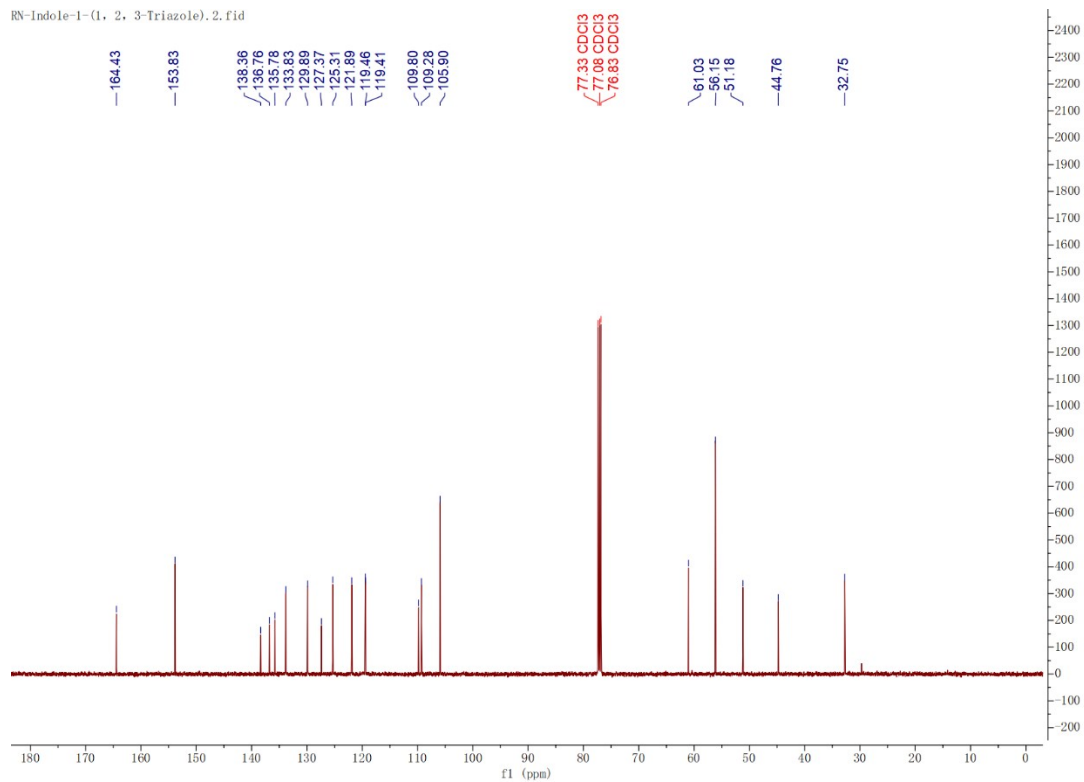

7r :

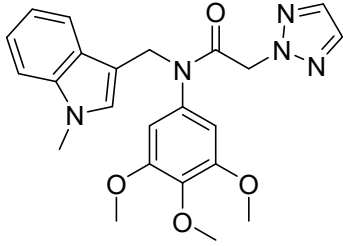

2 #16 RT: 0.16 AV: 1 NL: 2.51E8  
T: FTMS - c APCI corona Full ms [60.0000-900.0000]

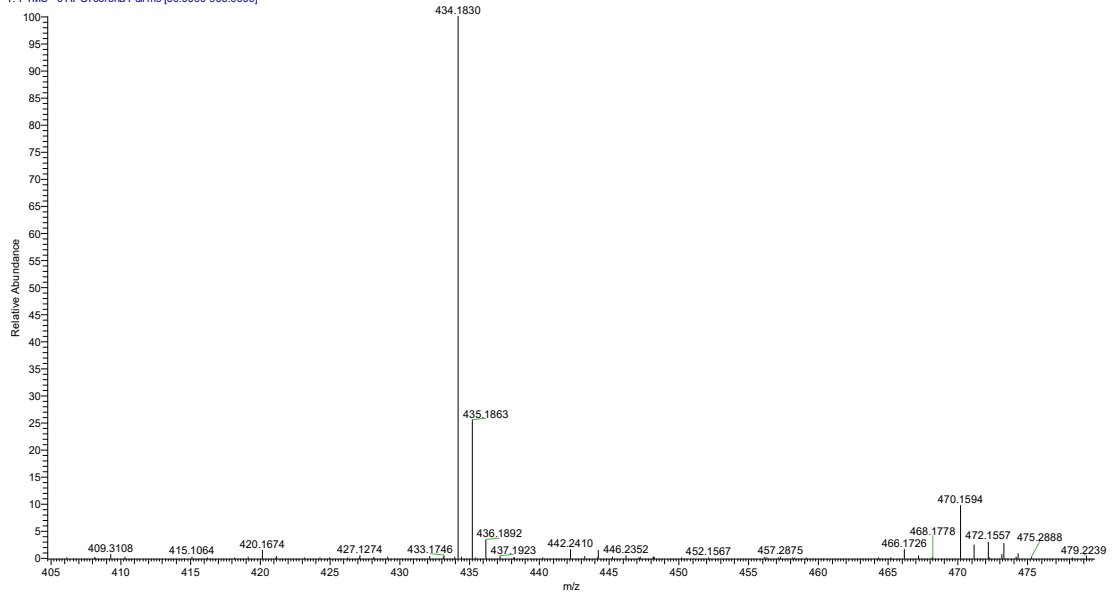

R-Indole-2-(1,2,3-Triazole)3.fid

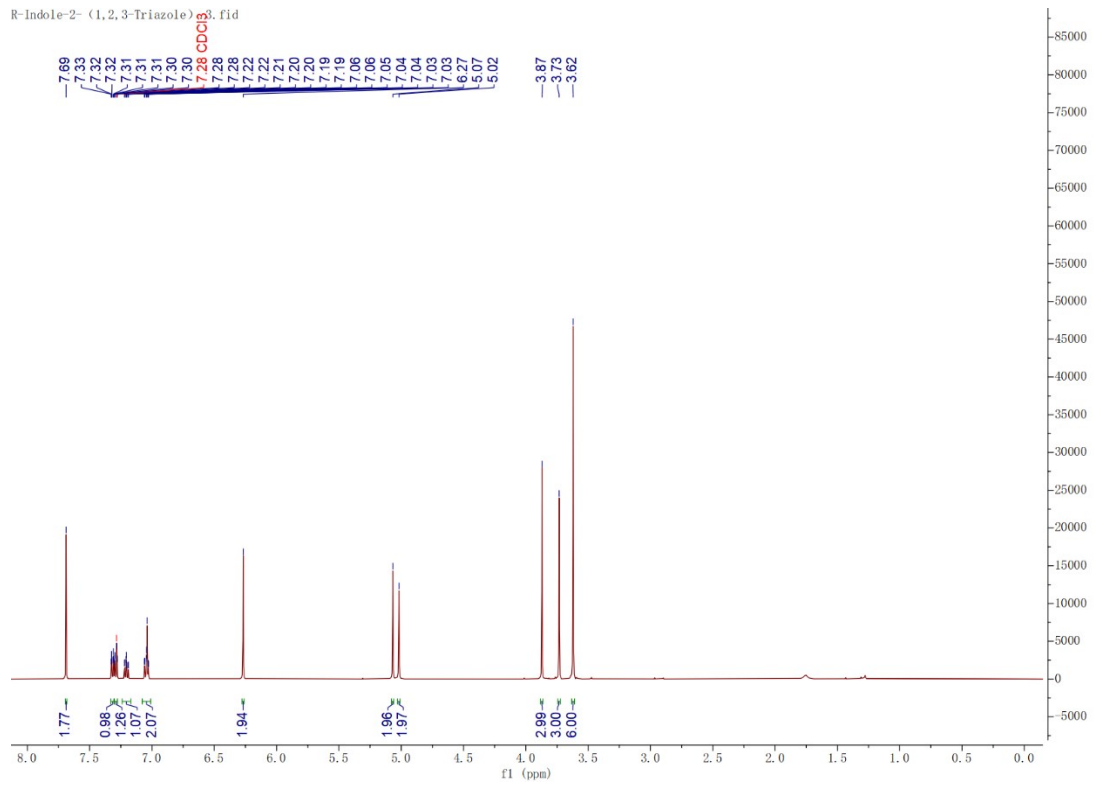

R-Indole-2- (1,2,3-Triazole) .2. fid

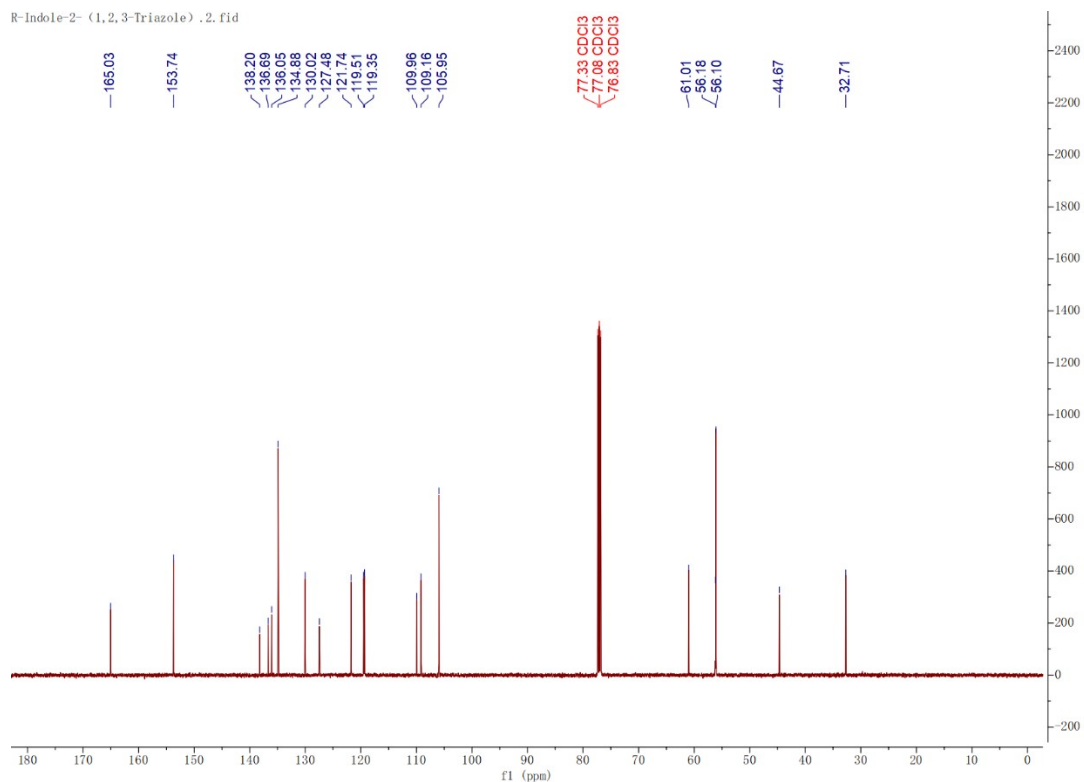

## Molecular docking study of 7a-7r

| Compounds | S-<br>score (kcal/m<br>ol) | Interactions                  | Amino acids involved                  | Atoms/fragment involved<br>in ligand |
|-----------|----------------------------|-------------------------------|---------------------------------------|--------------------------------------|
| 7a        | -5.90                      | -                             | -                                     | -                                    |
| 7b        | -6.08                      | -                             | -                                     | -                                    |
| 7c        | -6.74                      | H-acceptor, pi-pi             | ARG 264, HIS 192                      | N 29, 6-ring                         |
| 7d        | -7.16                      | pi-H, pi-cation, pi-pi        | GLU 196 ARG 264 HIS<br>192            | 5-ring, 6-ring, 6-ring               |
| 7e        | -6.64                      | H-donor                       | GLU 155                               | Br 33                                |
| 7f        | -7.36                      | H-donor, H-<br>acceptor, pi-H | GLU 196, LYS 104,<br>THR 193          | C 16, O 34, 5-ring                   |
| 7g        | -6.22                      | pi-H                          | ARG 390                               | 5-ring                               |
| 7h        | -6.25                      | -                             | -                                     | -                                    |
| 7i        | -7.02                      | H-acceptor, pi-H              | GLU 196, THR 193,<br>LYS 100, HIS 192 | C 27, 5-ring, 5-ring, 5-ring         |

|    |         |                             |                  |                |
|----|---------|-----------------------------|------------------|----------------|
| 7j | -6.95   | pi-cation, pi-pi            | ARG 264, HIS 100 | 5-ring, 6-ring |
| 7k | -6.57   | pi-cation, pi-pi            | THR 193, ARG 264 | 5-ring, 6-ring |
| 7l | -5.75   | pi-H                        | LYS 304          | 5-ring         |
| 7m | -6.77   | H-acceptor, pi-H, pi-cation | LYS 394, ARG 390 | O 14, 5-ring   |
| 7n | -6.78   | H-donor                     | ASP 199          | Cl 33          |
| 7o | -6.53   | pi-H, pi-H                  | GLU 196, LYS 100 | 5-ring, 6-ring |
| 7p | -5.71   | -                           | -                | -              |
| 7q | -5.71   | -                           | -                | -              |
| 7r | -5.8294 | -                           | -                | -              |

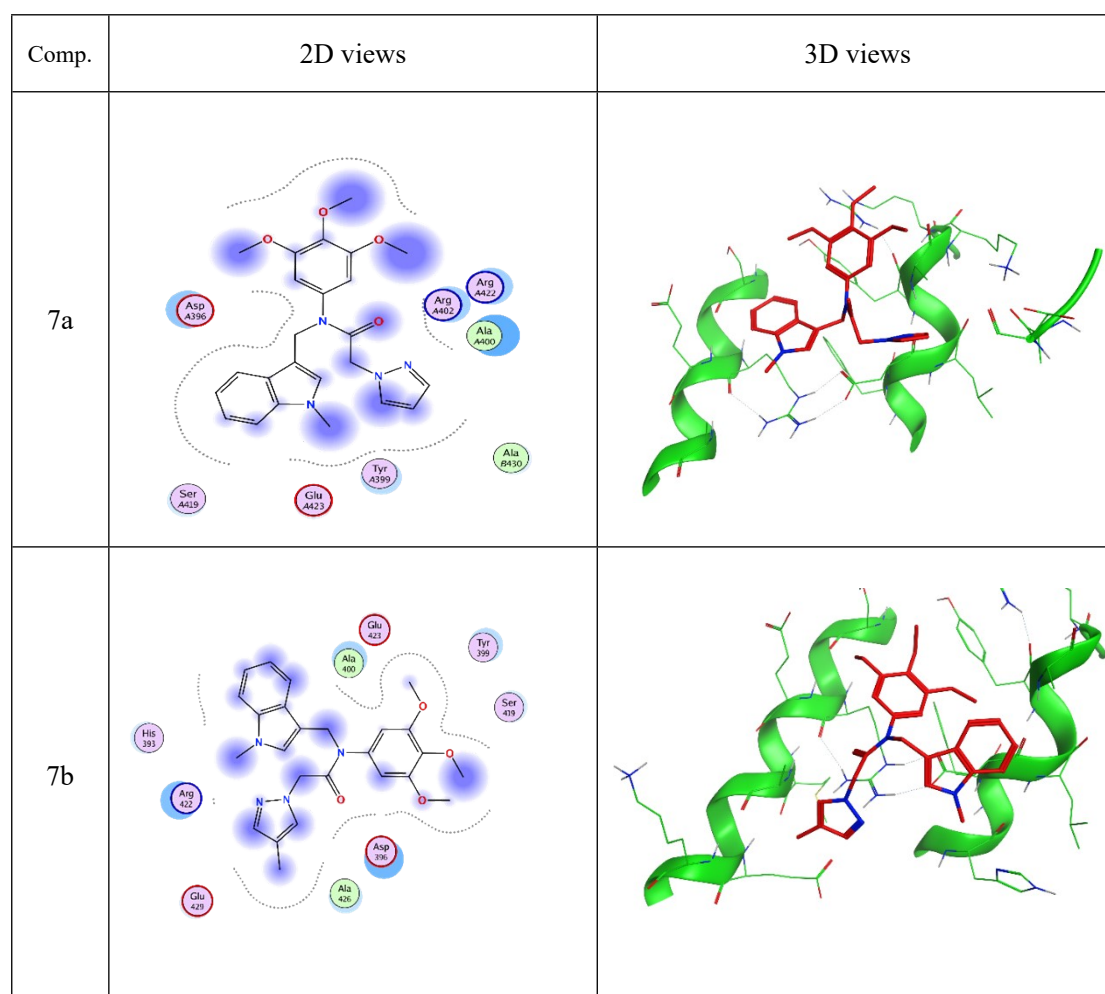

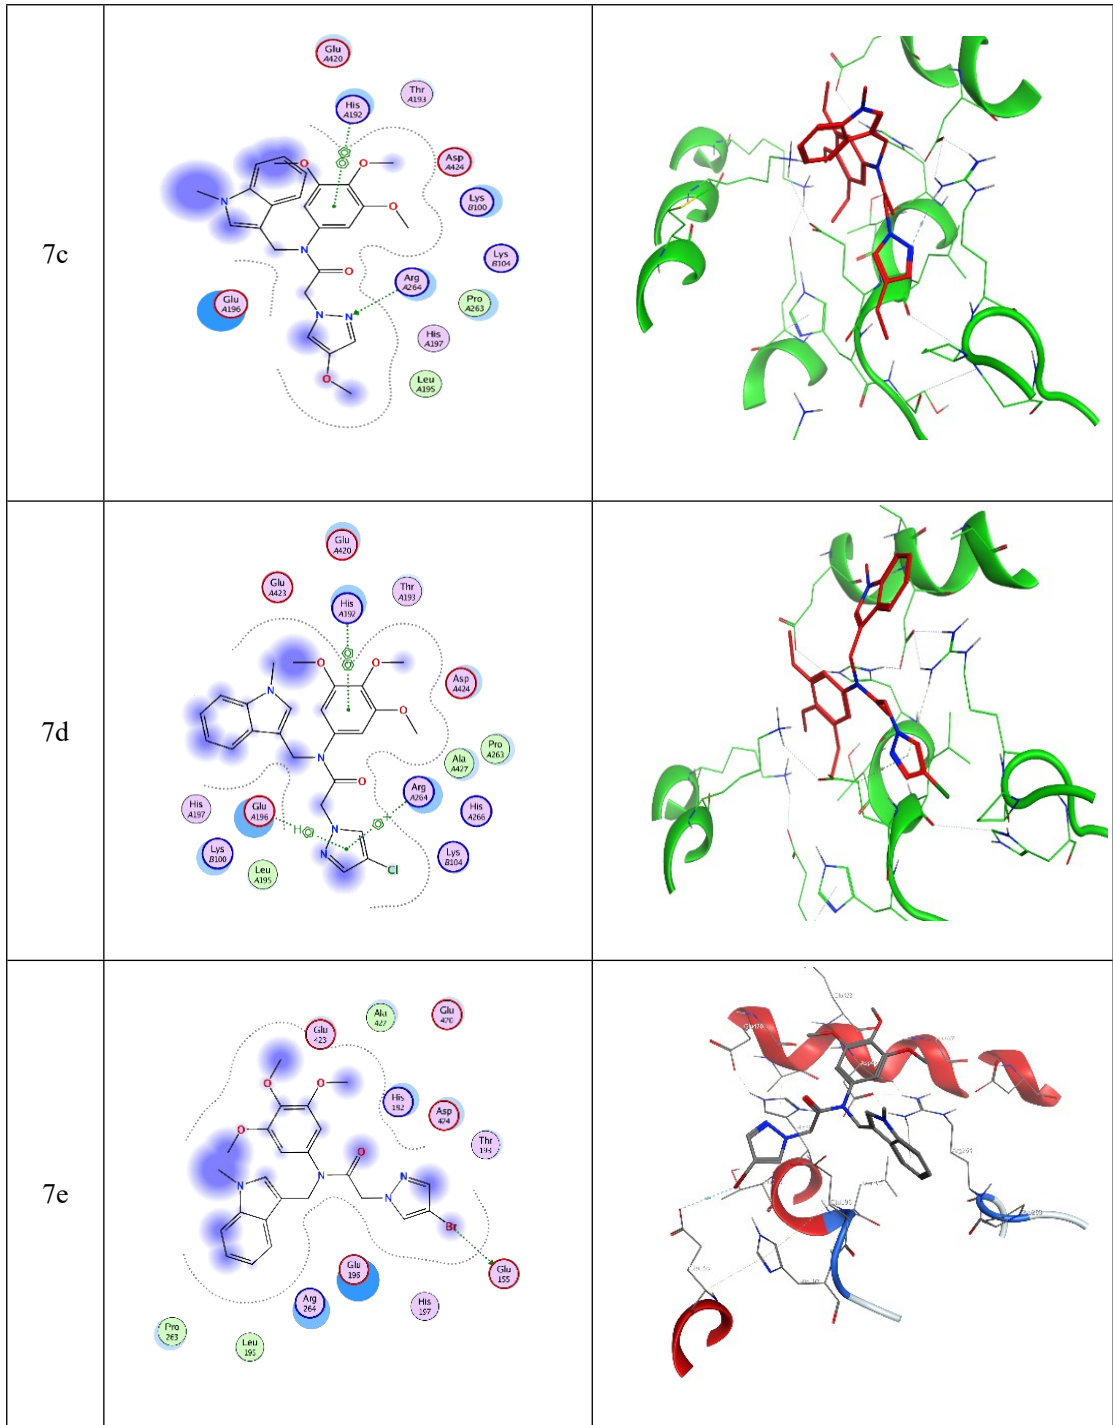

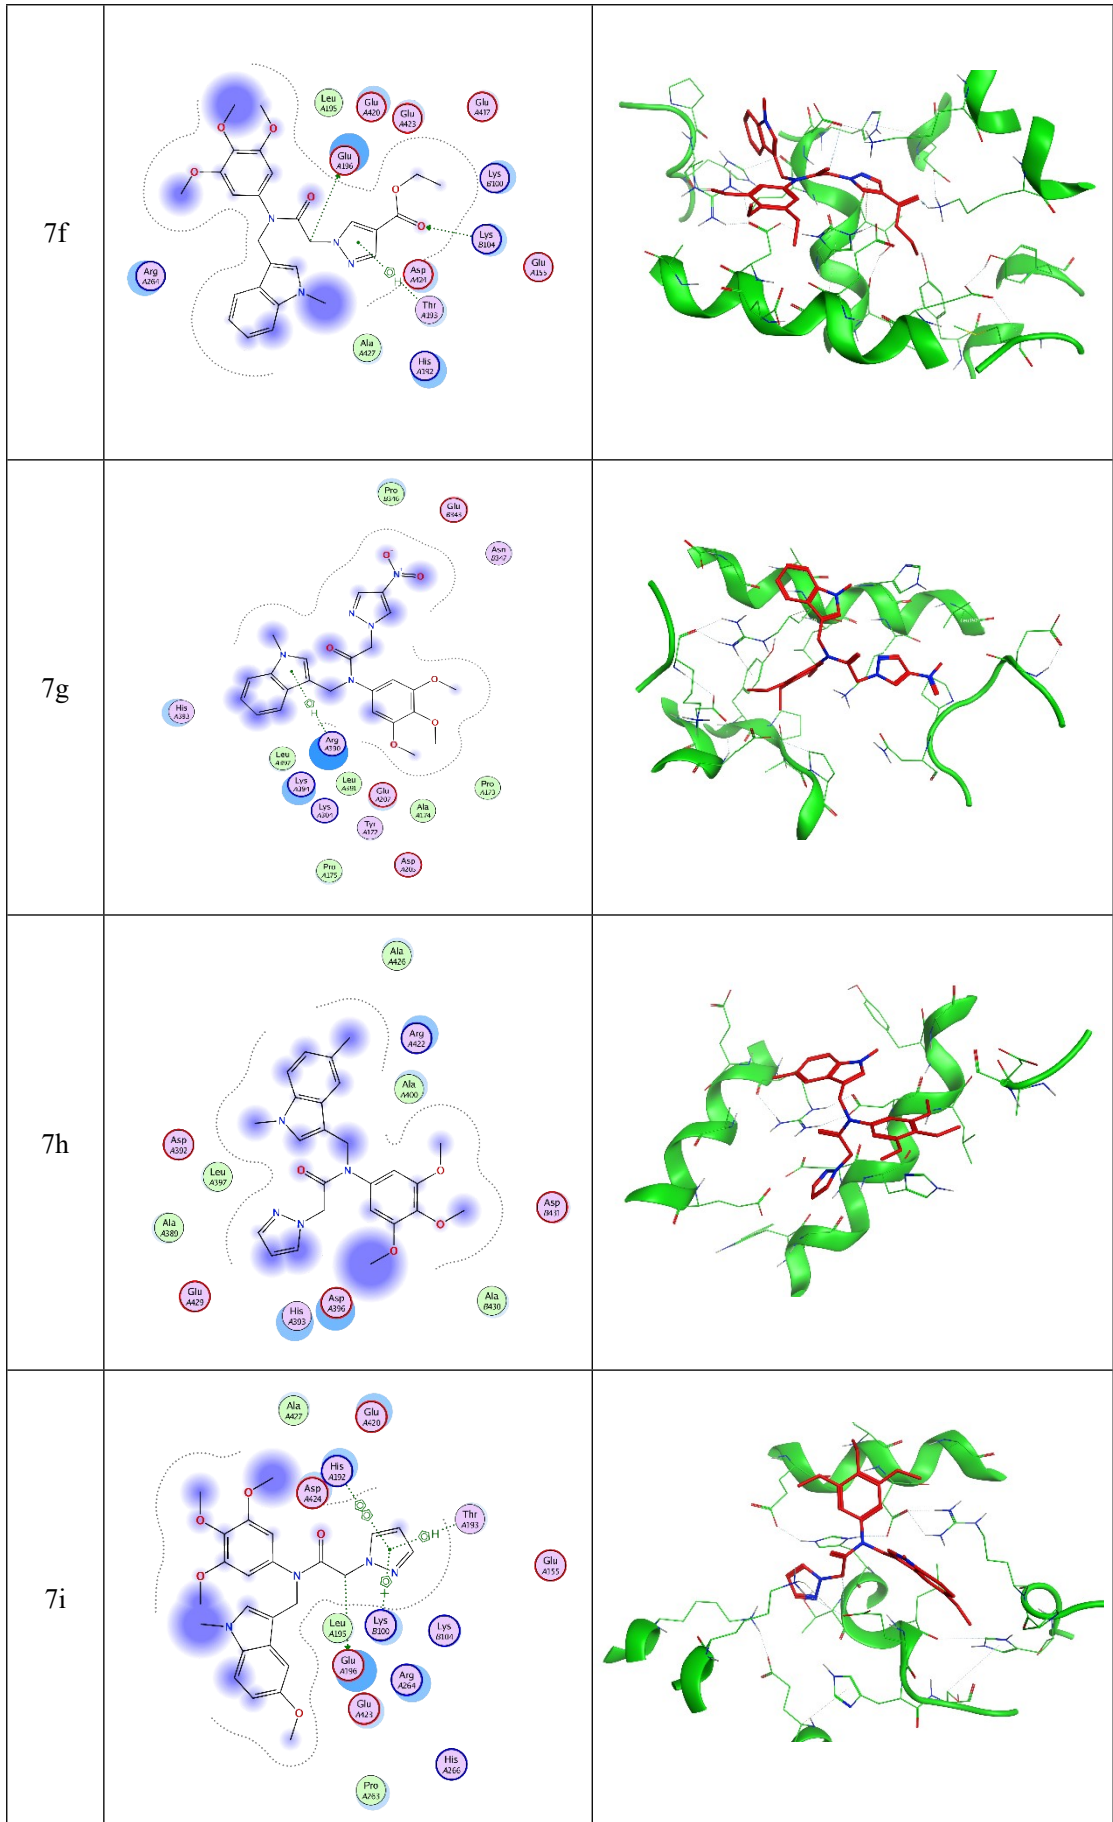



|    |  |  |
|----|--|--|
| 7j |  |  |
| 7k |  |  |
| 7l |  |  |
| 7m |  |  |





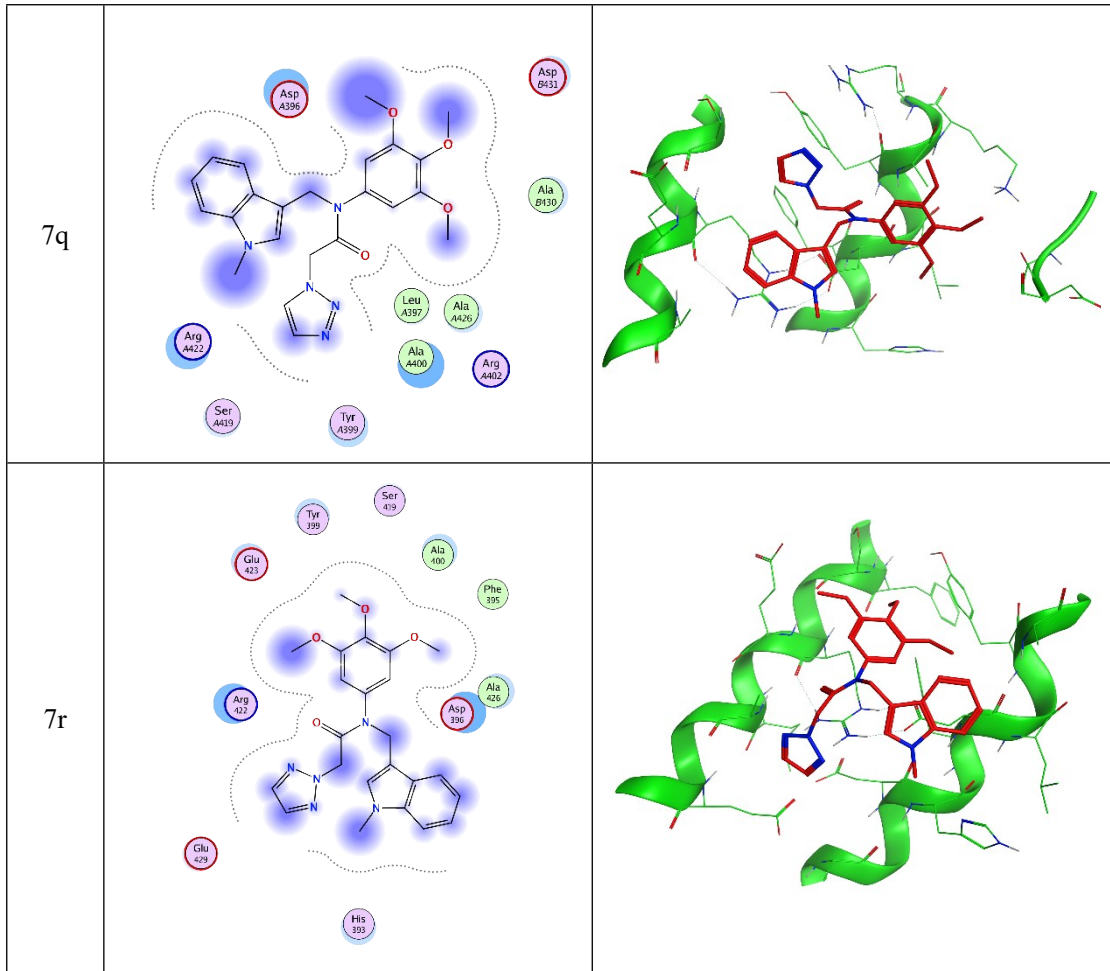

Supplement: d2md00340f1.pdf [file d2md00340f1.pdf]
